# Supplementary material for: Comprehensive Empirical Model of Substitution—Influence on Hydrogen Bonding in Aromatic Schiff Bases
Source: MDPI journal article supplement (doi:10.3390/ijms232012439), 2022-10-18

## Supplement SC: Topological analysis

### Comprehensive empirical model of substitution – influence on hydrogen bonding in aromatic Schiff bases

Katarzyna M. Krupka<sup>1</sup>, Michał Pocheć<sup>1</sup>, Jarosław J. Panek<sup>1</sup> and Aneta Jezierska<sup>1\*</sup>

<sup>1</sup>Faculty of Chemistry, University of Wrocław, ul. F. Joliot-Curie 14, 50-383 Wrocław, Poland

Correspondence should be addressed to: aneta.jezierska@chem.uni.wroc.pl.

**Table SC1.** QTAIM Bond Critical Point (BCP) properties for selected bonds in the nonsubstituted para isomer.

| BCP                     | Gas Phase                                      |                                                         | PCM                                            |                                                         |
|-------------------------|------------------------------------------------|---------------------------------------------------------|------------------------------------------------|---------------------------------------------------------|
|                         | $\rho_{\text{BCP}} [\text{e}^* \text{a}^{-3}]$ | $\nabla^2 \rho_{\text{BCP}} [\text{e}^* \text{a}^{-5}]$ | $\rho_{\text{BCP}} [\text{e}^* \text{a}^{-3}]$ | $\nabla^2 \rho_{\text{BCP}} [\text{e}^* \text{a}^{-5}]$ |
| Molecular form          |                                                |                                                         |                                                |                                                         |
| O-H                     | 0.345                                          | -2.621                                                  | 0.340                                          | -2.566                                                  |
| H...N                   | 0.046                                          | 0.108                                                   | 0.050                                          | 0.110                                                   |
| Proton-transferred form |                                                |                                                         |                                                |                                                         |
| O...H                   | 0.026                                          | 0.082                                                   | 0.026                                          | 0.081                                                   |
| H-N                     | 0.353                                          | -2.152                                                  | 0.354                                          | -2.160                                                  |

**Table SC2.** QTAIM Bond Critical Point (BCP) properties for selected bonds in the para isomer monosubstituted with the NH<sub>2</sub> group in the proximal position 1.

| BCP                     | Gas Phase                                      |                                                         | PCM                                            |                                                         |
|-------------------------|------------------------------------------------|---------------------------------------------------------|------------------------------------------------|---------------------------------------------------------|
|                         | $\rho_{\text{BCP}} [\text{e}^* \text{a}^{-3}]$ | $\nabla^2 \rho_{\text{BCP}} [\text{e}^* \text{a}^{-5}]$ | $\rho_{\text{BCP}} [\text{e}^* \text{a}^{-3}]$ | $\nabla^2 \rho_{\text{BCP}} [\text{e}^* \text{a}^{-5}]$ |
| Molecular form          |                                                |                                                         |                                                |                                                         |
| O-H                     | 0.342                                          | -2.586                                                  | 0.337                                          | -2.519                                                  |
| H...N                   | 0.051                                          | 0.112                                                   | 0.056                                          | 0.113                                                   |
| Proton-transferred form |                                                |                                                         |                                                |                                                         |
| O...H                   | 0.026                                          | 0.082                                                   | 0.025                                          | 0.081                                                   |
| H-N                     | 0.356                                          | -2.172                                                  | 0.357                                          | -2.182                                                  |

**Table SC3.** QTAIM Bond Critical Point (BCP) properties for selected bonds in the para isomer monosubstituted with the NH<sub>2</sub> group in the proximal position 4.

| BCP                            | Gas Phase                                      |                                                         | PCM                                            |                                                         |
|--------------------------------|------------------------------------------------|---------------------------------------------------------|------------------------------------------------|---------------------------------------------------------|
|                                | $\rho_{\text{BCP}} [\text{e}^* \text{a}^{-3}]$ | $\nabla^2 \rho_{\text{BCP}} [\text{e}^* \text{a}^{-5}]$ | $\rho_{\text{BCP}} [\text{e}^* \text{a}^{-3}]$ | $\nabla^2 \rho_{\text{BCP}} [\text{e}^* \text{a}^{-5}]$ |
| <b>Molecular form</b>          |                                                |                                                         |                                                |                                                         |
| O-H                            | 0.343                                          | -2.605                                                  | 0.340                                          | -2.562                                                  |
| H...N                          | 0.047                                          | 0.108                                                   | 0.050                                          | 0.109                                                   |
| <b>Proton-transferred form</b> |                                                |                                                         |                                                |                                                         |
| O...H                          | 0.026                                          | 0.083                                                   | 0.025                                          | 0.082                                                   |
| H-N                            | 0.354                                          | -2.154                                                  | 0.355                                          | -2.162                                                  |

**Table SC4.** QTAIM Bond Critical Point (BCP) properties for selected bonds in the para isomer monosubstituted with the NO<sub>2</sub> group in the proximal position 1.

| BCP                            | Gas Phase                                      |                                                         | PCM                                            |                                                         |
|--------------------------------|------------------------------------------------|---------------------------------------------------------|------------------------------------------------|---------------------------------------------------------|
|                                | $\rho_{\text{BCP}} [\text{e}^* \text{a}^{-3}]$ | $\nabla^2 \rho_{\text{BCP}} [\text{e}^* \text{a}^{-5}]$ | $\rho_{\text{BCP}} [\text{e}^* \text{a}^{-3}]$ | $\nabla^2 \rho_{\text{BCP}} [\text{e}^* \text{a}^{-5}]$ |
| <b>Molecular form</b>          |                                                |                                                         |                                                |                                                         |
| O-H                            | 0.336                                          | -2.525                                                  | 0.333                                          | -2.492                                                  |
| H...N                          | 0.056                                          | 0.112                                                   | 0.058                                          | 0.112                                                   |
| <b>Proton-transferred form</b> |                                                |                                                         |                                                |                                                         |
| O...H                          | 0.025                                          | 0.082                                                   | 0.025                                          | 0.081                                                   |
| H-N                            | 0.357                                          | -2.206                                                  | 0.358                                          | -2.210                                                  |

**Table SC5.** QTAIM Bond Critical Point (BCP) properties for selected bonds in the para isomer monosubstituted with the NO<sub>2</sub> group in the proximal position 4.

| BCP                            | Gas Phase                                      |                                                         | PCM                                            |                                                         |
|--------------------------------|------------------------------------------------|---------------------------------------------------------|------------------------------------------------|---------------------------------------------------------|
|                                | $\rho_{\text{BCP}} [\text{e}^* \text{a}^{-3}]$ | $\nabla^2 \rho_{\text{BCP}} [\text{e}^* \text{a}^{-5}]$ | $\rho_{\text{BCP}} [\text{e}^* \text{a}^{-3}]$ | $\nabla^2 \rho_{\text{BCP}} [\text{e}^* \text{a}^{-5}]$ |
| <b>Molecular form</b>          |                                                |                                                         |                                                |                                                         |
| O-H                            | 0.338                                          | -2.549                                                  | 0.329                                          | -2.444                                                  |
| H...N                          | 0.052                                          | 0.109                                                   | 0.058                                          | 0.109                                                   |
| <b>Proton-transferred form</b> |                                                |                                                         |                                                |                                                         |
| O...H                          | 0.025                                          | 0.081                                                   | 0.025                                          | 0.079                                                   |
| H-N                            | 0.355                                          | -2.181                                                  | 0.357                                          | -2.195                                                  |

**Table SC6.** QTAIM Bond Critical Point (BCP) properties for selected bonds in the para isomer monosubstituted with the Br atom in the proximal position 1.

| BCP                            | Gas Phase                                      |                                                         | PCM                                            |                                                         |
|--------------------------------|------------------------------------------------|---------------------------------------------------------|------------------------------------------------|---------------------------------------------------------|
|                                | $\rho_{\text{BCP}} [\text{e}^* \text{a}^{-3}]$ | $\nabla^2 \rho_{\text{BCP}} [\text{e}^* \text{a}^{-5}]$ | $\rho_{\text{BCP}} [\text{e}^* \text{a}^{-3}]$ | $\nabla^2 \rho_{\text{BCP}} [\text{e}^* \text{a}^{-5}]$ |
| <b>Molecular form</b>          |                                                |                                                         |                                                |                                                         |
| O-H                            | 0.338                                          | -2.547                                                  | 0.334                                          | -2.499                                                  |
| H...N                          | 0.054                                          | 0.112                                                   | 0.057                                          | 0.112                                                   |
| <b>Proton-transferred form</b> |                                                |                                                         |                                                |                                                         |
| O...H                          | 0.025                                          | 0.082                                                   | 0.025                                          | 0.081                                                   |
| H-N                            | 0.358                                          | -2.203                                                  | 0.358                                          | -2.210                                                  |

**Table SC7.** QTAIM Bond Critical Point (BCP) properties for selected bonds in the para isomer monosubstituted with the Br atom in the proximal position 4.

| BCP                            | Gas Phase                                      |                                                         | PCM                                            |                                                         |
|--------------------------------|------------------------------------------------|---------------------------------------------------------|------------------------------------------------|---------------------------------------------------------|
|                                | $\rho_{\text{BCP}} [\text{e}^* \text{a}^{-3}]$ | $\nabla^2 \rho_{\text{BCP}} [\text{e}^* \text{a}^{-5}]$ | $\rho_{\text{BCP}} [\text{e}^* \text{a}^{-3}]$ | $\nabla^2 \rho_{\text{BCP}} [\text{e}^* \text{a}^{-5}]$ |
| <b>Molecular form</b>          |                                                |                                                         |                                                |                                                         |
| O-H                            | 0.341                                          | -2.586                                                  | 0.335                                          | -2.508                                                  |
| H...N                          | 0.049                                          | 0.109                                                   | 0.054                                          | 0.110                                                   |
| <b>Proton-transferred form</b> |                                                |                                                         |                                                |                                                         |
| O...H                          | 0.026                                          | 0.082                                                   | 0.025                                          | 0.081                                                   |
| H-N                            | 0.355                                          | -2.173                                                  | 0.356                                          | -2.184                                                  |

**Table SC8.** QTAIM net atomic charges for atoms forming quasi-ring in the nonsubstituted para isomer.

| Net atomic charge [e]          | Gas Phase | PCM    |
|--------------------------------|-----------|--------|
| <b>Molecular form</b>          |           |        |
| O                              | -1.200    | -1.198 |
| H                              | 0.667     | 0.666  |
| N                              | -1.133    | -1.128 |
| C <sub>B</sub>                 | 0.626     | 0.628  |
| C6                             | -0.028    | -0.028 |
| C5                             | 0.601     | 0.580  |
| SUM                            | -0.467    | -0.480 |
| <b>Proton-transferred form</b> |           |        |
| O                              | -1.156    | -1.151 |
| H                              | 0.512     | 0.509  |
| N                              | -1.208    | -1.203 |
| C <sub>B</sub>                 | 0.479     | 0.485  |
| C6                             | -0.044    | -0.047 |
| C5                             | 0.900     | 0.894  |
| SUM                            | -0.517    | -0.513 |

**Table SC9.** QTAIM net atomic charges for atoms forming quasi-ring in the para isomer monosubstituted with the NH<sub>2</sub> group in the proximal position 1.

| Net atomic charge [e]          | Gas Phase | PCM    |
|--------------------------------|-----------|--------|
| <b>Molecular form</b>          |           |        |
| O                              | -1.205    | -1.188 |
| H                              | 0.664     | 0.660  |
| N                              | -1.138    | -1.115 |
| C <sub>B</sub>                 | 0.626     | 0.617  |
| C6                             | -0.052    | -0.043 |
| C5                             | 0.617     | 0.580  |
| SUM                            | -0.488    | -0.489 |
| <b>Proton-transferred form</b> |           |        |
| O                              | -1.151    | -1.149 |
| H                              | 0.505     | 0.502  |
| N                              | -1.200    | -1.188 |
| C <sub>B</sub>                 | 0.507     | 0.480  |
| C6                             | -0.068    | -0.070 |
| C5                             | 0.889     | 0.890  |
| SUM                            | -0.518    | -0.535 |

**Table SC10.** QTAIM net atomic charges for atoms forming quasi-ring in the para isomer monosubstituted with the NH<sub>2</sub> group in the proximal position 4.

| Net atomic charge [e]          | Gas Phase | PCM    |
|--------------------------------|-----------|--------|
| <b>Molecular form</b>          |           |        |
| O                              | -1.196    | -1.185 |
| H                              | 0.648     | 0.653  |
| N                              | -1.139    | -1.132 |
| C <sub>B</sub>                 | 0.650     | 0.657  |
| C6                             | -0.021    | -0.030 |
| C5                             | 0.578     | 0.591  |
| SUM                            | -0.480    | -0.446 |
| <b>Proton-transferred form</b> |           |        |
| O                              | -1.168    | -1.155 |
| H                              | 0.479     | 0.512  |
| N                              | -1.181    | -1.231 |
| C <sub>B</sub>                 | 0.508     | 0.511  |
| C6                             | -0.037    | -0.051 |
| C5                             | 0.869     | 0.845  |
| SUM                            | -0.530    | -0.569 |

**Table SC11.** QTAIM net atomic charges for atoms forming quasi-ring in the para isomer monosubstituted with the NO<sub>2</sub> group in the proximal position 1.

| Net atomic charge [e]          | Gas Phase | PCM    |
|--------------------------------|-----------|--------|
| <b>Molecular form</b>          |           |        |
| O                              | -1.202    | -1.187 |
| H                              | 0.664     | 0.650  |
| N                              | -1.111    | -1.123 |
| C <sub>B</sub>                 | 0.613     | 0.651  |
| C6                             | -0.019    | -0.011 |
| C5                             | 0.651     | 0.634  |
| SUM                            | -0.404    | -0.386 |
| <b>Proton-transferred form</b> |           |        |
| O                              | -1.146    | -1.143 |
| H                              | 0.503     | 0.505  |
| N                              | -1.184    | -1.184 |
| C <sub>B</sub>                 | 0.529     | 0.529  |
| C6                             | -0.038    | -0.041 |
| C5                             | 0.899     | 0.898  |
| SUM                            | -0.437    | -0.436 |

**Table SC12.** QTAIM net atomic charges for atoms forming quasi-ring in the para isomer monosubstituted with the NO<sub>2</sub> group in the proximal position 4.

| Net atomic charge [e]          | Gas Phase | PCM    |
|--------------------------------|-----------|--------|
| <b>Molecular form</b>          |           |        |
| O                              | -1.173    | -1.180 |
| H                              | 0.654     | 0.676  |
| N                              | -1.136    | -1.163 |
| C <sub>B</sub>                 | 0.655     | 0.646  |
| C6                             | -0.020    | -0.027 |
| C5                             | 0.700     | 0.656  |
| SUM                            | -0.320    | -0.392 |
| <b>Proton-transferred form</b> |           |        |
| O                              | -1.127    | -1.116 |
| H                              | 0.508     | 0.509  |
| N                              | -1.245    | -1.220 |
| C <sub>B</sub>                 | 0.526     | 0.500  |
| C6                             | -0.042    | -0.039 |
| C5                             | 0.955     | 0.938  |
| SUM                            | -0.425    | -0.428 |

**Table SC13.** QTAIM net atomic charges for atoms forming quasi-ring in the para isomer monosubstituted with the Br atom in the proximal position 1.

| Net atomic charge [e]          | Gas Phase | PCM    |
|--------------------------------|-----------|--------|
| <b>Molecular form</b>          |           |        |
| O                              | -1.189    | -1.196 |
| H                              | 0.649     | 0.663  |
| N                              | -1.127    | -1.146 |
| C <sub>B</sub>                 | 0.636     | 0.648  |
| C6                             | -0.005    | -0.028 |
| C5                             | 0.629     | 0.620  |
| SUM                            | -0.407    | -0.439 |
| <b>Proton-transferred form</b> |           |        |
| O                              | -1.148    | -1.148 |
| H                              | 0.497     | 0.502  |
| N                              | -1.200    | -1.201 |
| C <sub>B</sub>                 | 0.524     | 0.524  |
| C6                             | -0.042    | -0.043 |
| C5                             | 0.891     | 0.891  |
| SUM                            | -0.478    | -0.475 |

**Table SC14.** QTAIM net atomic charges for atoms forming quasi-ring in the para isomer monosubstituted with the Br atom in the proximal position 4.

| Net atomic charge [e]          | Gas Phase | PCM    |
|--------------------------------|-----------|--------|
| <b>Molecular form</b>          |           |        |
| O                              | -1.186    | -1.178 |
| H                              | 0.651     | 0.647  |
| N                              | -1.140    | -1.137 |
| C <sub>B</sub>                 | 0.653     | 0.645  |
| C6                             | -0.022    | -0.014 |
| C5                             | 0.634     | 0.679  |
| SUM                            | -0.410    | -0.358 |
| <b>Proton-transferred form</b> |           |        |
| O                              | -1.132    | -1.116 |
| H                              | 0.512     | 0.509  |
| N                              | -1.178    | -1.220 |
| C <sub>B</sub>                 | 0.484     | 0.450  |
| C6                             | -0.019    | -0.039 |
| C5                             | 0.913     | 0.938  |
| SUM                            | -0.420    | -0.478 |

**Figure SC1.** QTAIM topology maps for the nonsubstituted para isomer: a) molecular form in the gas phase, b) proton-transferred form in the gas phase, c) molecular form in PCM, d) proton-transferred form in PCM. The orange and yellow dots mark the BCPs and RCPs, respectively. Yellow lines pinpoint the intramolecular interaction paths.

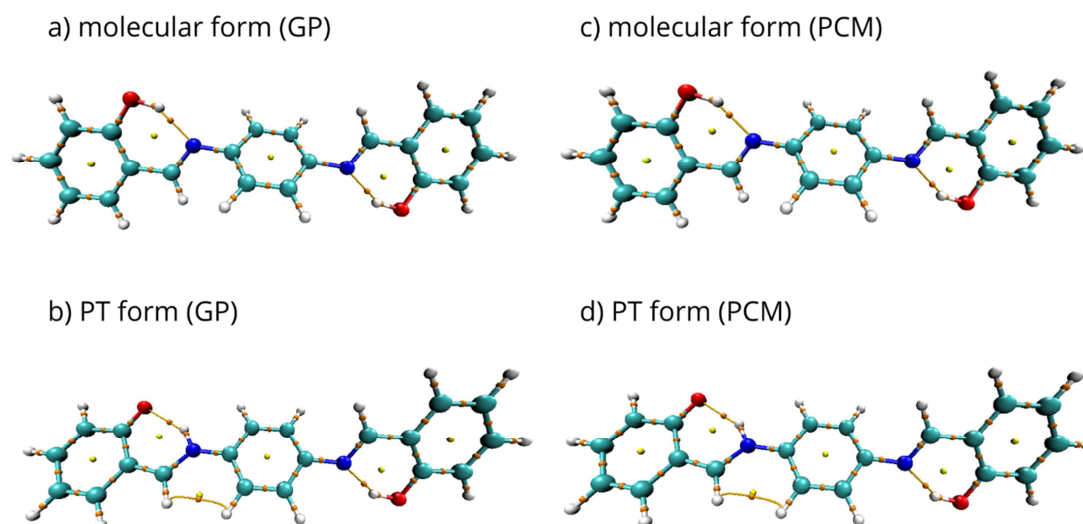

**Figure SC2.** QTAIM topology maps for the para isomer monosubstituted with the  $\text{NH}_2$  group in the proximal position 1: a) molecular form in the gas phase, b) proton-transferred form in the gas phase, c) molecular form in PCM, d) proton-transferred form in PCM. The orange and yellow dots mark the BCPs and RCPs, respectively. Yellow lines pinpoint the intramolecular interaction paths.

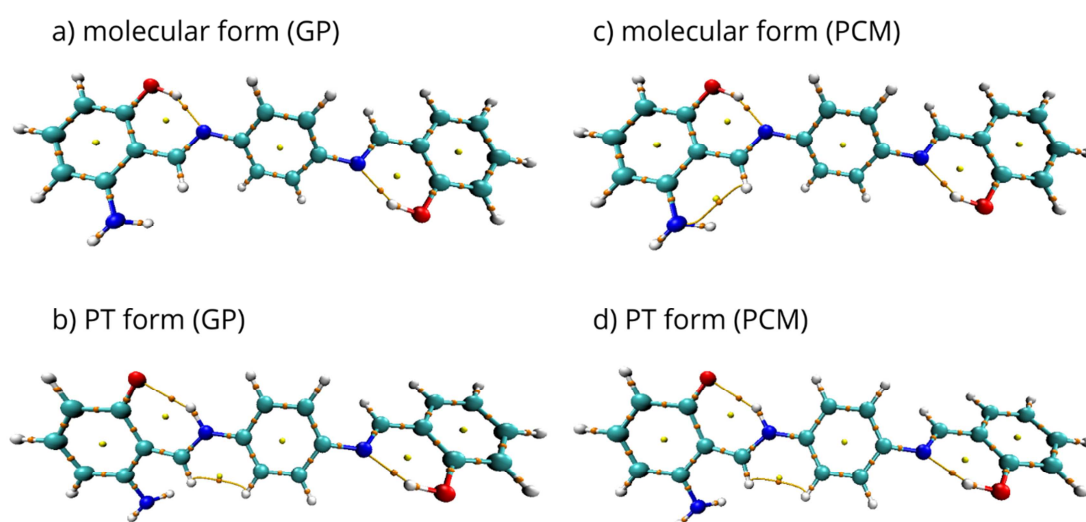

**Figure SC3.** QTAIM topology maps for the para isomer monosubstituted with the  $\text{NH}_2$  group in the proximal position 4: a) molecular form in the gas phase, b) proton-transferred form in the gas phase, c) molecular form in PCM, d) proton-transferred form in PCM. The orange and yellow dots mark the BCPs and RCPs, respectively. Yellow lines pinpoint the intramolecular interaction paths.

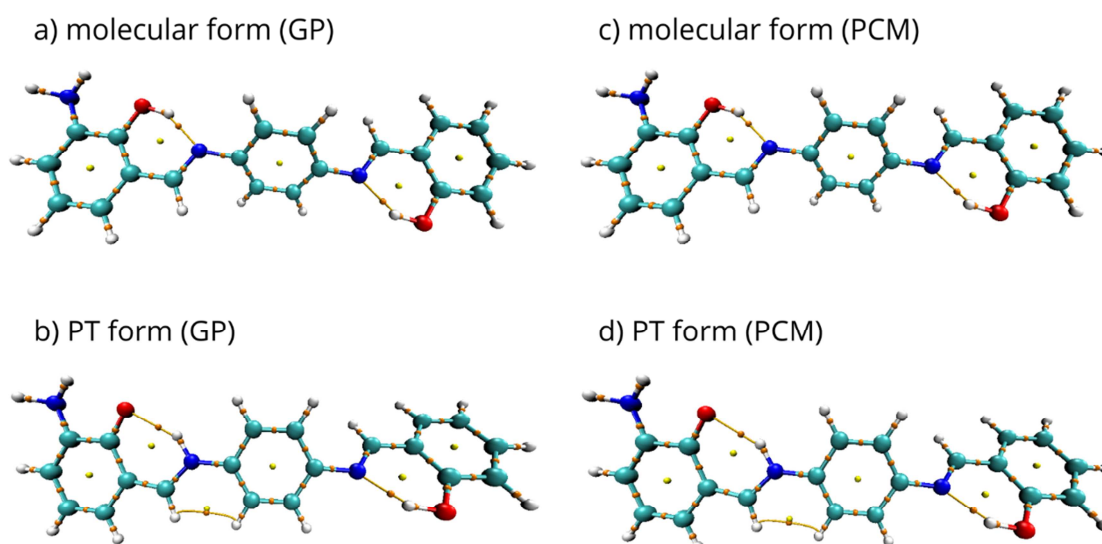

**Figure SC4.** QTAIM topology maps for the para isomer monosubstituted with the  $\text{NO}_2$  group in the proximal position 1: a) molecular form in the gas phase, b) proton-transferred form in the gas phase, c) molecular form in PCM, d) proton-transferred form in PCM. The orange and yellow dots mark the BCPs and RCPs, respectively. Yellow lines pinpoint the intramolecular interaction paths.

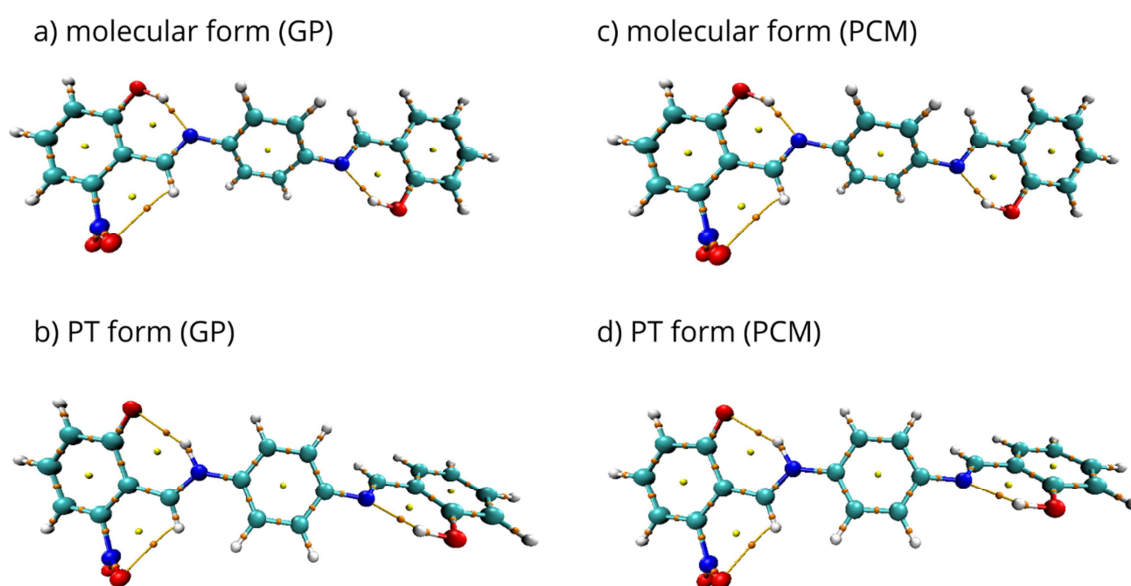



**Figure SC5.** QTAIM topology maps for para the isomer monosubstituted with the NO<sub>2</sub> group in the proximal position 4: a) molecular form in the gas phase, b) proton-transferred form in the gas phase, c) molecular form in PCM, d) proton-transferred form in PCM. The orange and yellow dots mark the BCPs and RCPs, respectively. Yellow lines pinpoint the intramolecular interaction paths.

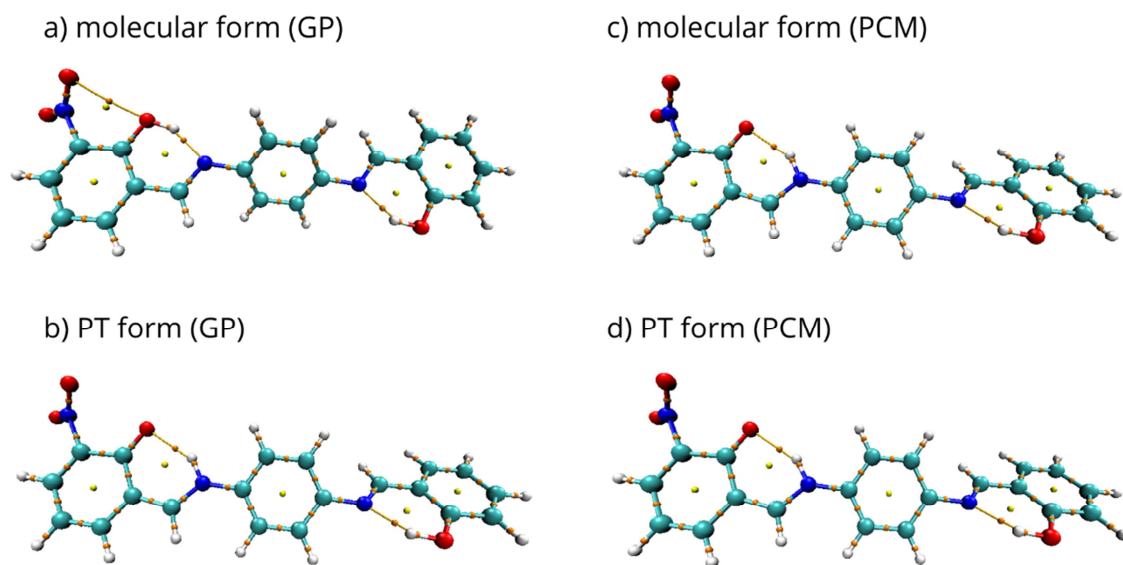

**Figure SC6.** QTAIM topology maps for the para isomer monosubstituted with the Br atom in the proximal position 1: a) molecular form in the gas phase, b) proton-transferred form in the gas phase, c) molecular form in PCM, d) proton-transferred form in PCM. The orange and yellow dots mark the BCPs and RCPs, respectively. Yellow lines pinpoint the intramolecular interaction paths.

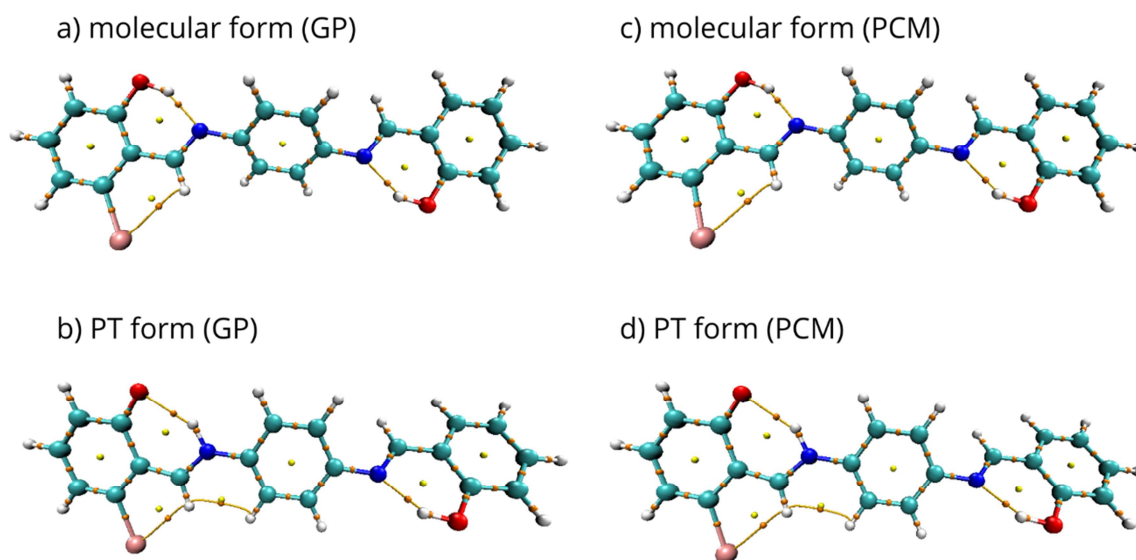

**Figure SC7.** QTAIM topology maps for the para isomer monosubstituted with the Br atom in the proximal position 4: a) molecular form in the gas phase, b) proton-transferred form in the gas phase, c) molecular form in PCM, d) proton-transferred form in PCM. The orange and yellow dots mark the BCPs and RCPs, respectively. Yellow lines pinpoint the intramolecular interaction paths.

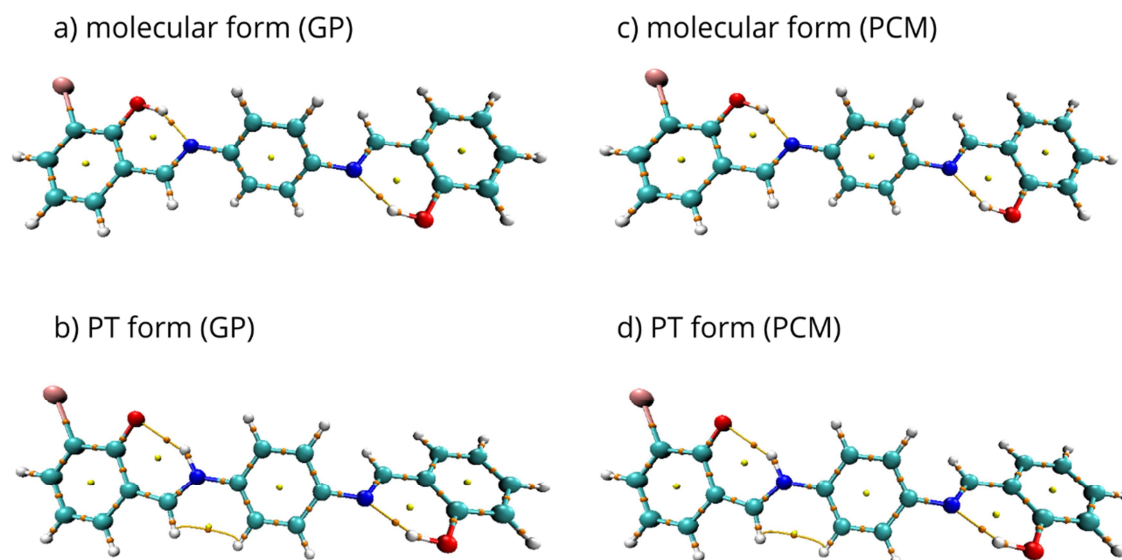

**Figure SC8.** NCI gradient isosurfaces and scatter graphs for the nonsubstituted para isomer in the gas phase: a) molecular form, b) proton-transferred form.

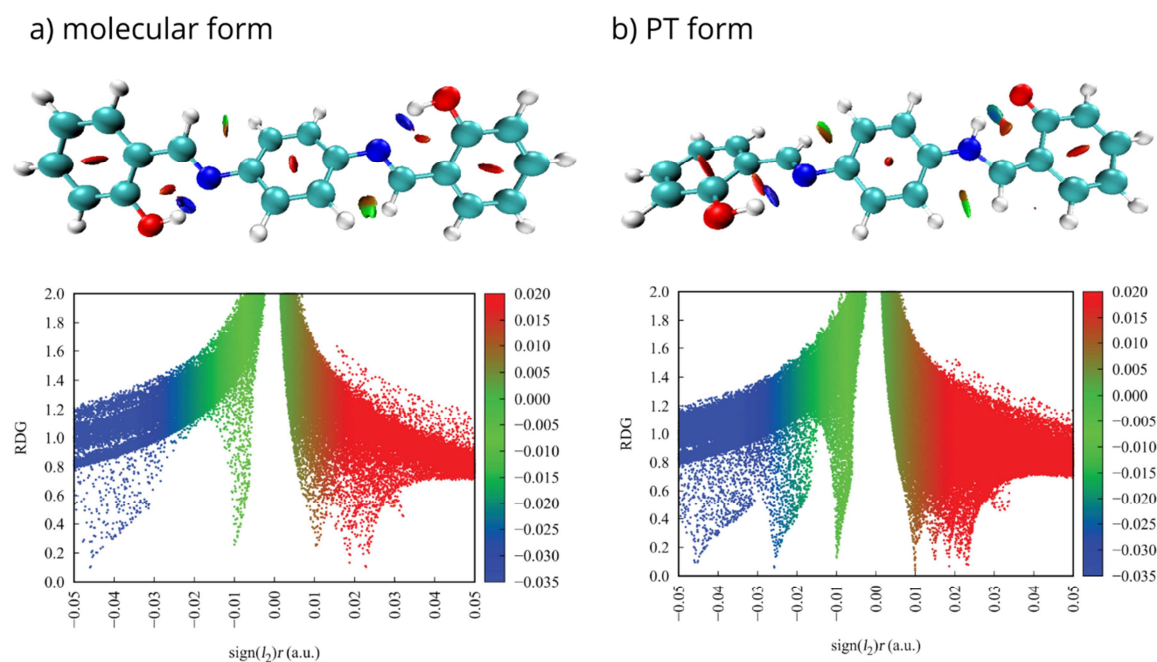

**Figure SC9.** NCI gradient isosurfaces and scatter graphs for the para isomer monosubstituted with the  $\text{NH}_2$  group in the proximal position 1 in the gas phase: a) molecular form, b) proton-transferred form.

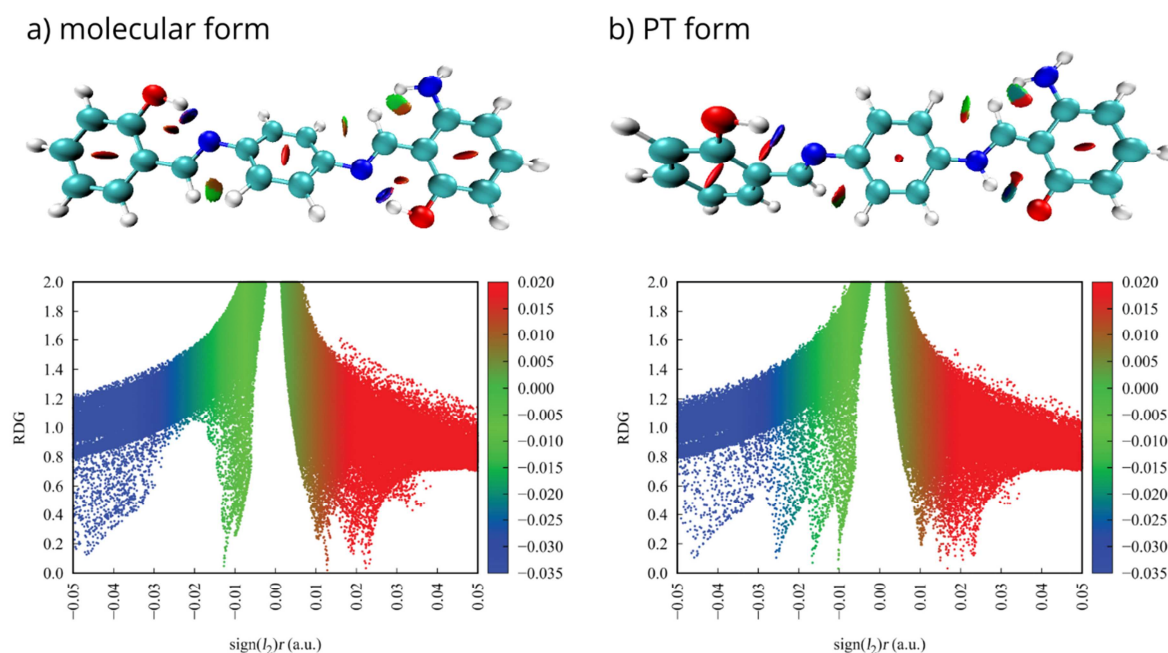

**Figure SC10.** NCI gradient isosurfaces and scatter graphs for the para isomer monosubstituted with the  $\text{NH}_2$  group in the proximal position 4 in the gas phase: a) molecular form, b) proton-transferred form.

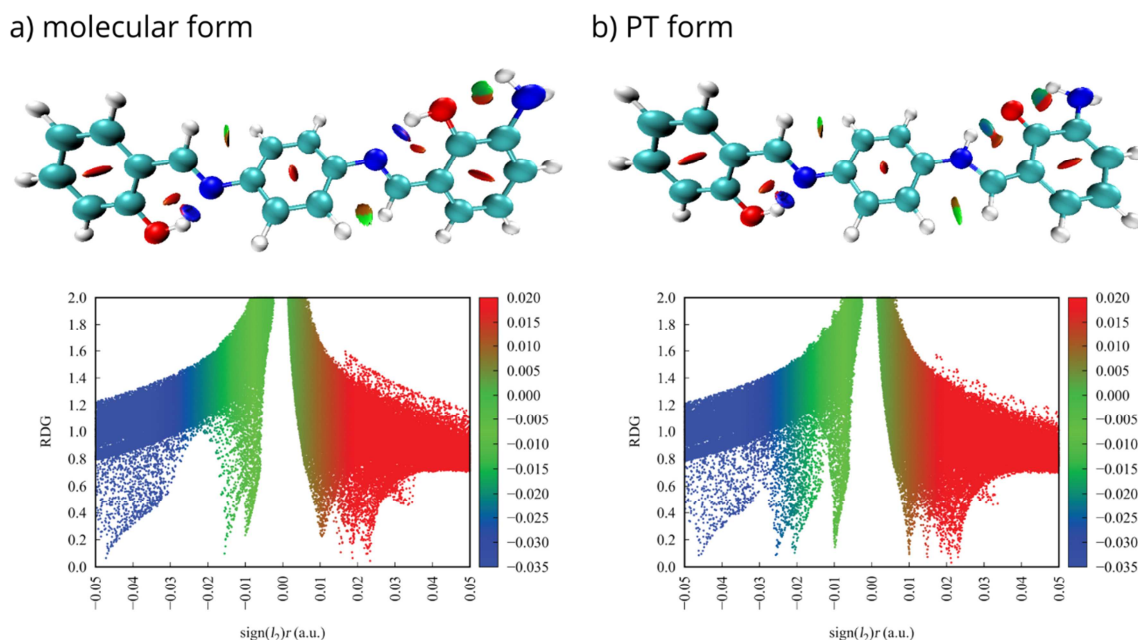

**Figure SC11.** NCI gradient isosurfaces and scatter graphs for the para isomer monosubstituted with the NO<sub>2</sub> group in the proximal position 1 in the gas phase: a) molecular form, b) proton-transferred form.

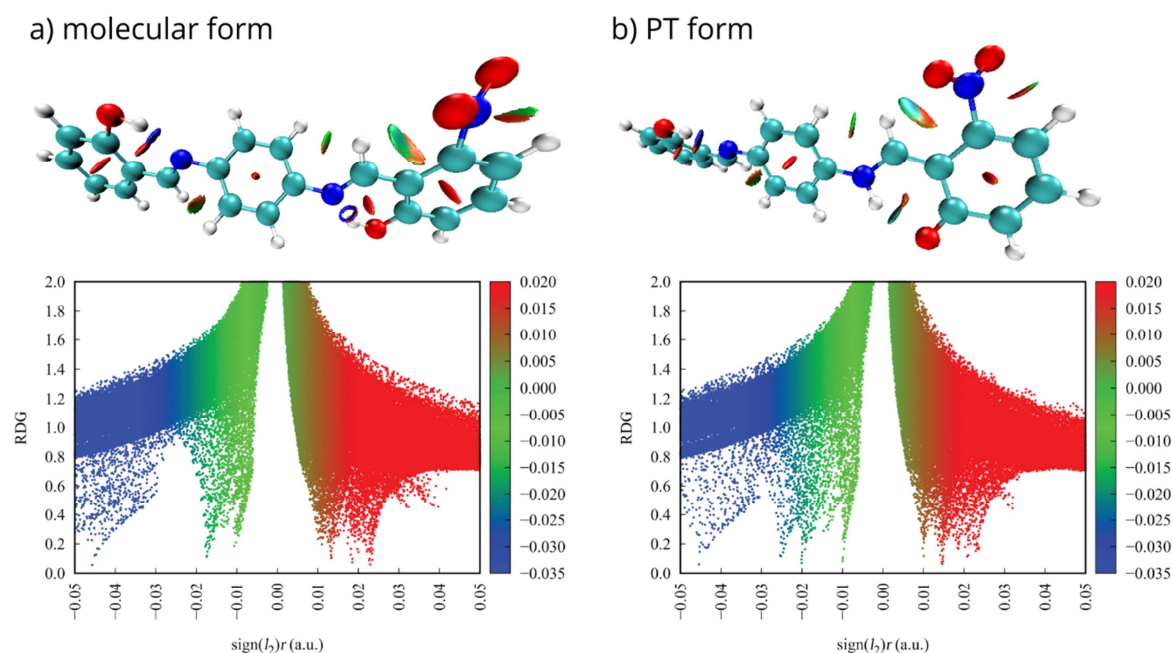

**Figure SC12.** NCI gradient isosurfaces and scatter graphs for the para isomer monosubstituted with the NO<sub>2</sub> group in the proximal position 4 in the gas phase: a) molecular form, b) proton-transferred form.

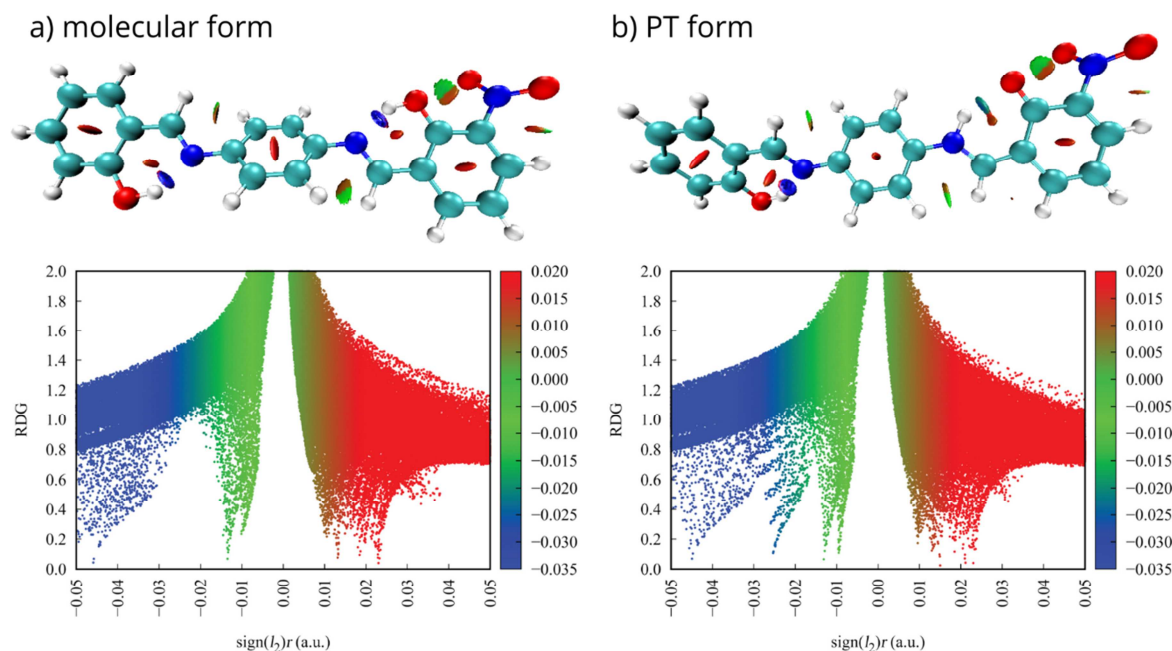



**Figure SC13.** NCI gradient isosurfaces and scatter graphs for the para isomer monosubstituted with the Br atom in the proximal position 1 in the gas phase: a) molecular form, b) proton-transferred form.

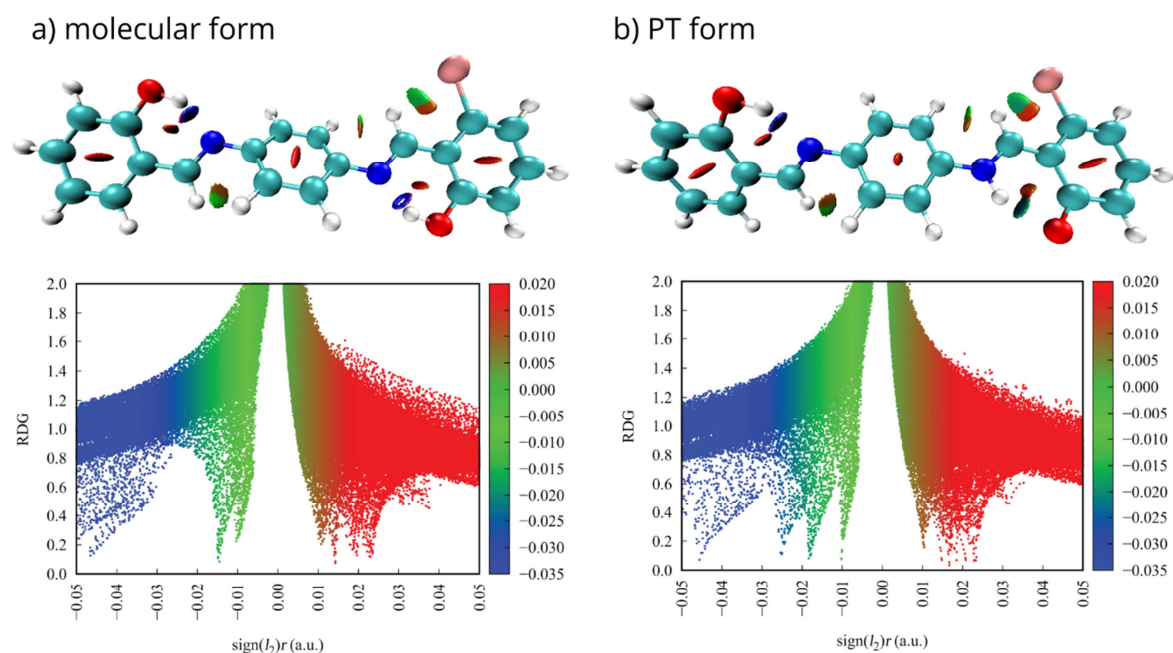

**Figure SC14.** NCI gradient isosurfaces and scatter graphs for the para isomer monosubstituted with the Br atom in the proximal position 4 in the gas phase: a) molecular form, b) proton-transferred form.

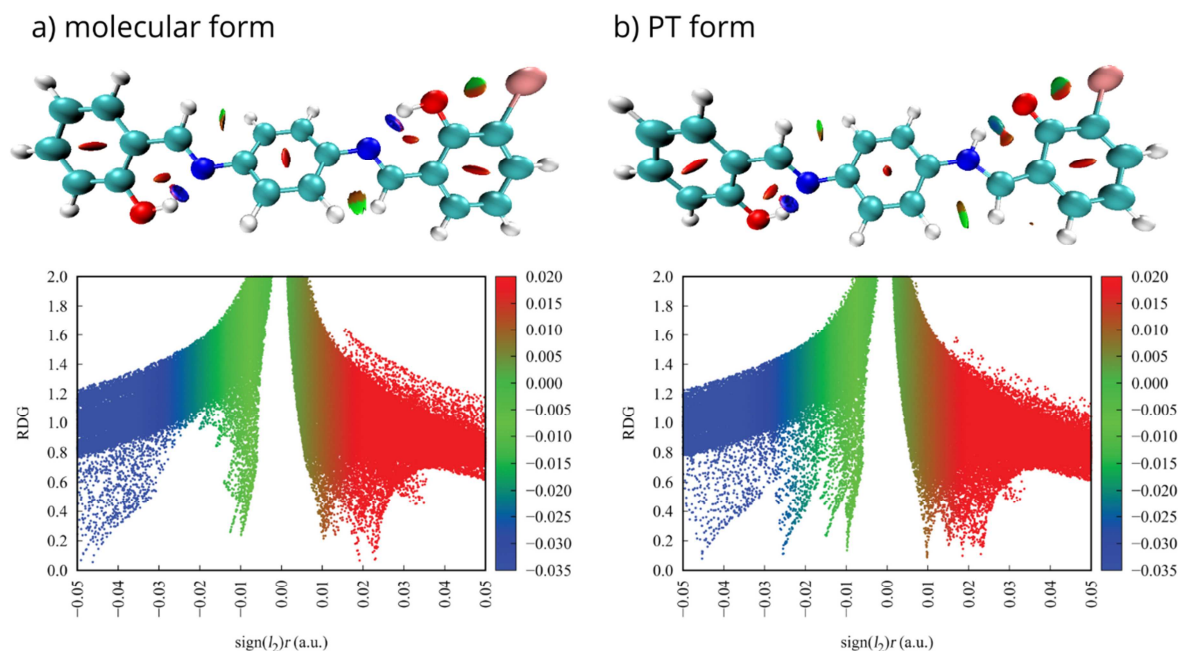

**Figure SC15.** NCI gradient isosurfaces and scatter graphs for the nonsubstituted para isomer in PCM: a) molecular form, b) proton-transferred form.

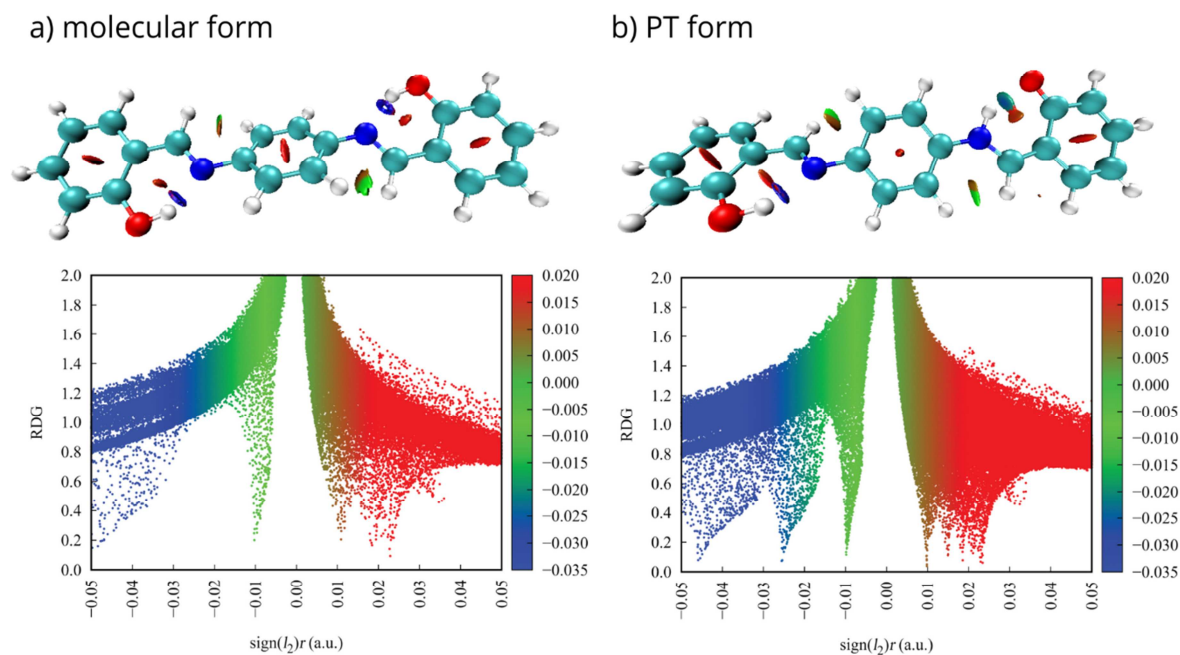

**Figure SC16.** NCI gradient isosurfaces and scatter graphs for the para isomer monosubstituted with the  $\text{NH}_2$  group in the proximal position 1 in PCM: a) molecular form, b) proton-transferred form.

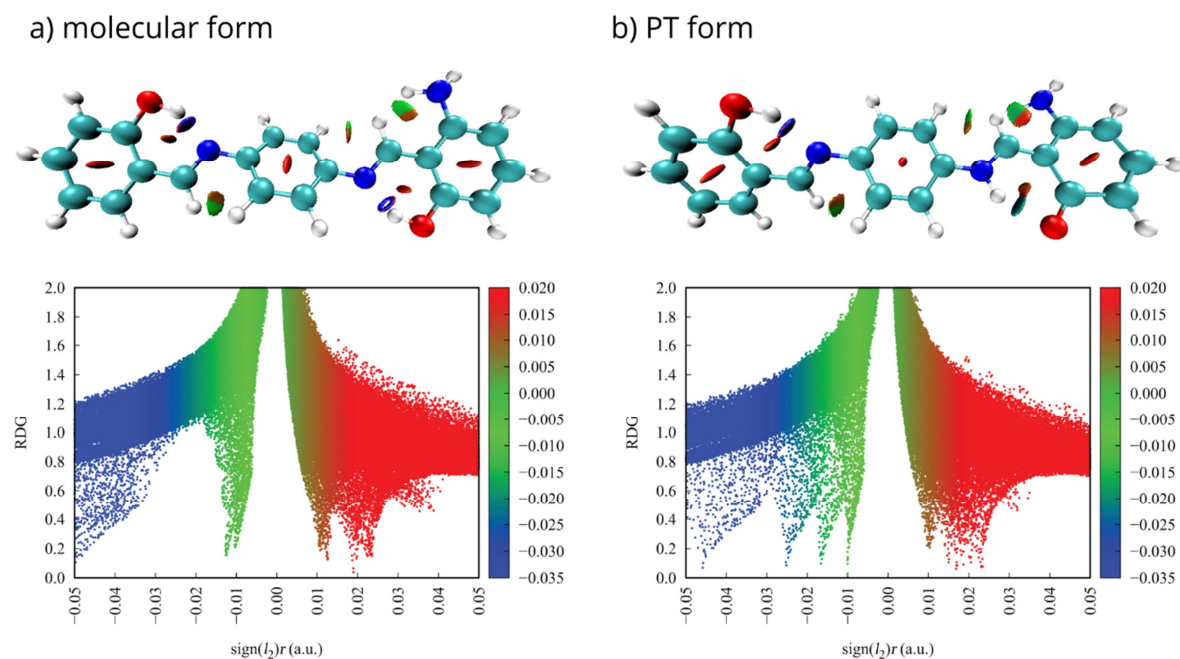

**Figure SC17.** NCI gradient isosurfaces and scatter graphs for the para isomer monosubstituted with the  $\text{NH}_2$  group in the proximal position 4 in PCM: a) molecular form, b) proton-transferred form.

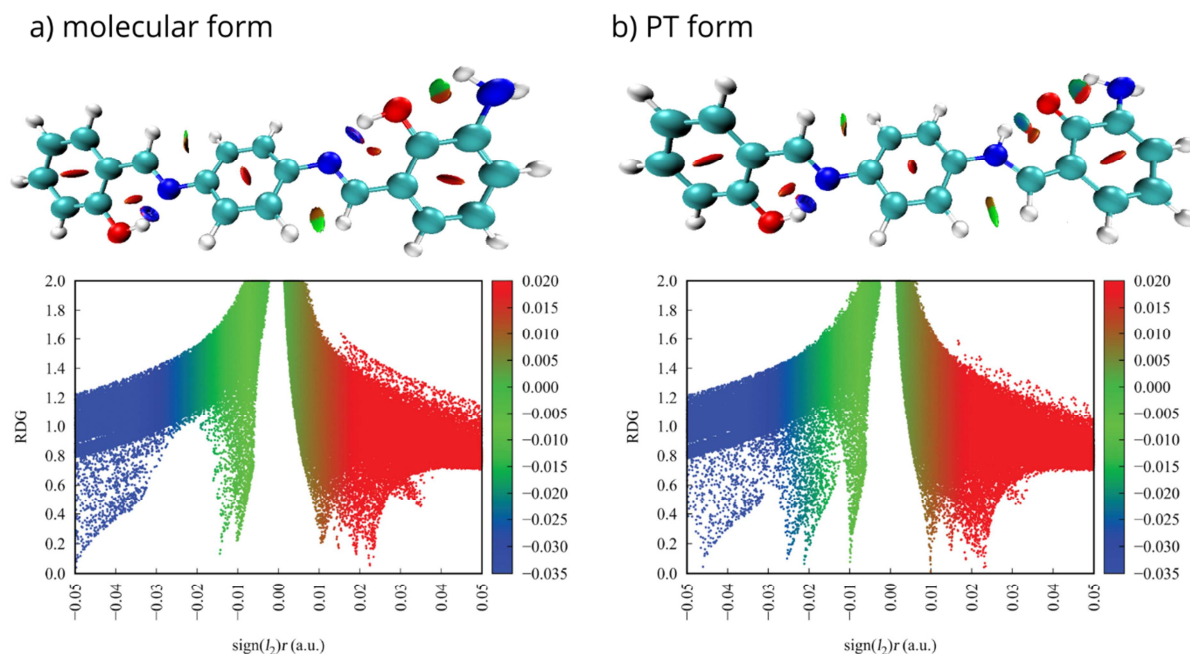

**Figure SC18.** NCI gradient isosurfaces and scatter graphs for the para isomer monosubstituted with the  $\text{NO}_2$  group in the proximal position 1 in PCM: a) molecular form, b) proton-transferred form.

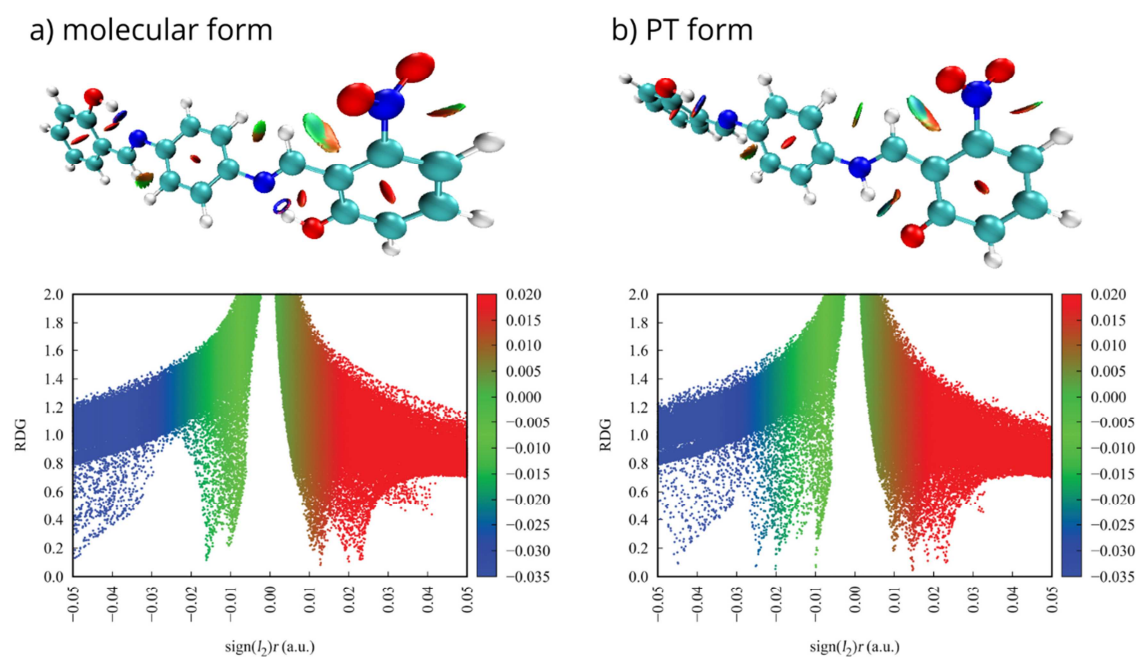

**Figure SC19.** NCI gradient isosurfaces and scatter graphs for the para isomer monosubstituted with the NO<sub>2</sub> group in the proximal position 4 in PCM: a) molecular form, b) proton-transferred form.

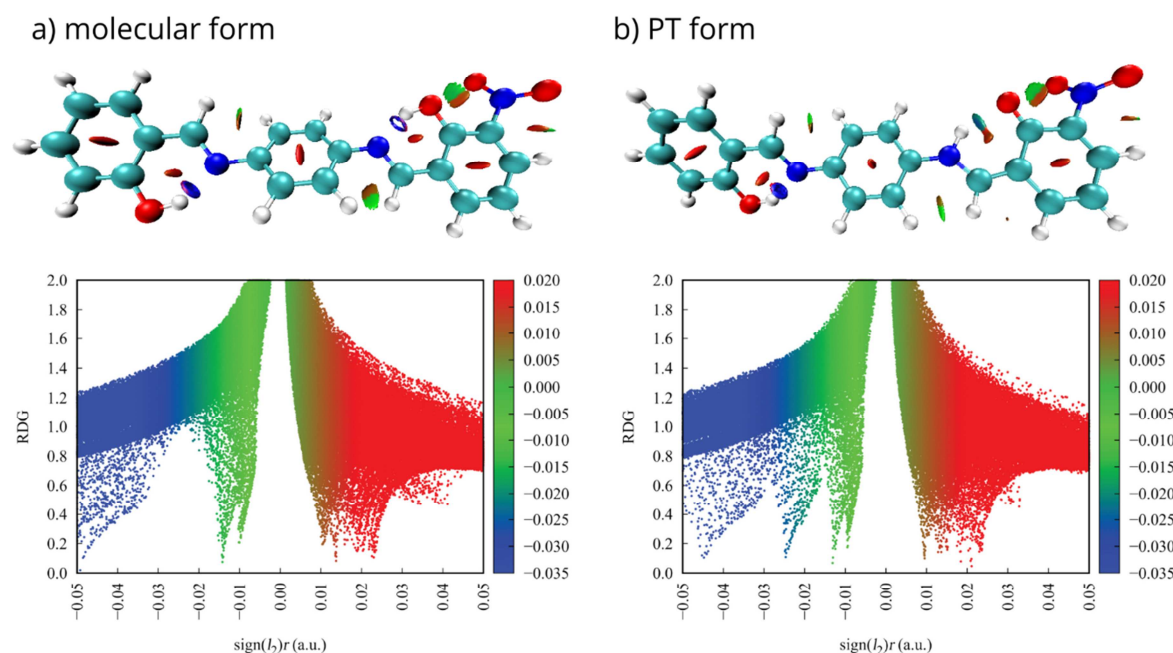

**Figure SC20.** NCI gradient isosurfaces and scatter graphs for the para isomer monosubstituted with the Br atom in the proximal position 1 in PCM: a) molecular form, b) proton-transferred form.

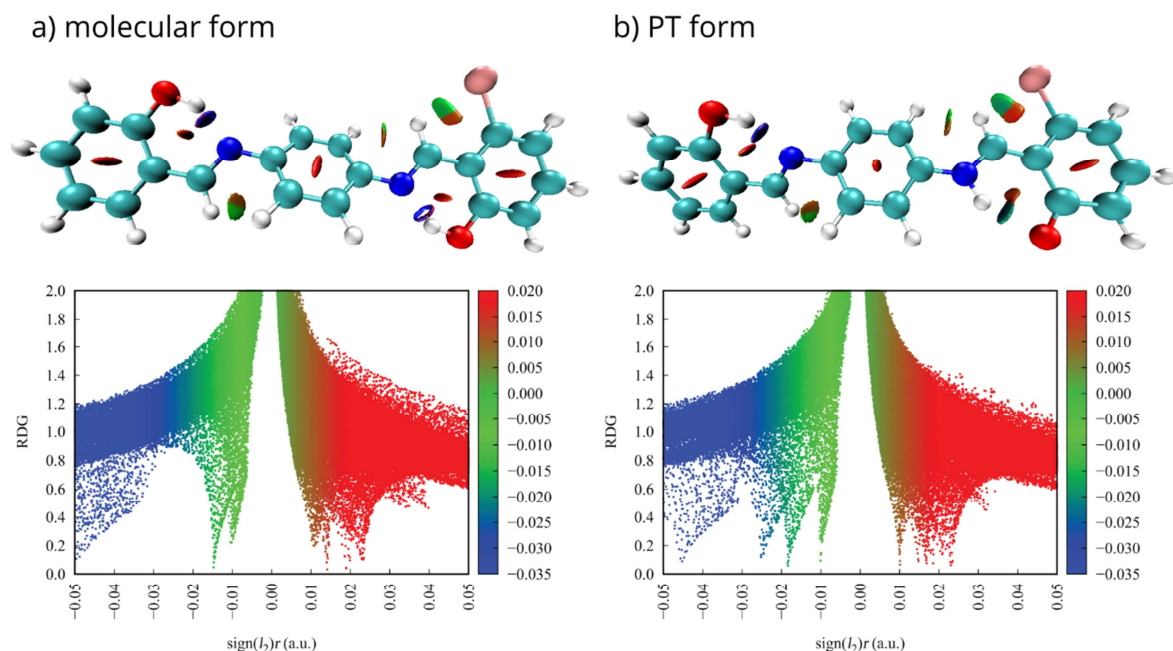



**Figure SC21.** NCI gradient isosurfaces and scatter graphs for the para isomer monosubstituted with the Br atom in the proximal position 4 in PCM: a) molecular form, b) proton-transferred form.

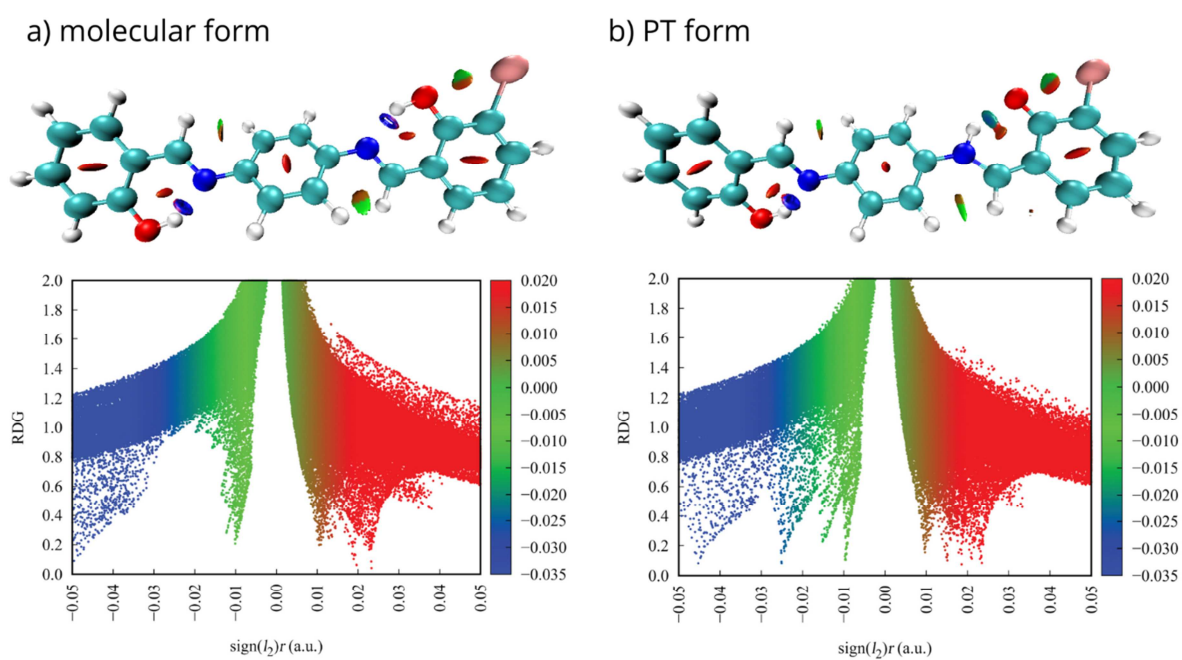

Supplement: s1 [file s1]
