# Supplementary material for: Comprehensive Empirical Model of Substitution—Influence on Hydrogen Bonding in Aromatic Schiff Bases
Source: MDPI journal article supplement (doi:10.3390/ijms232012439), 2022-10-18

## Supplement SB: Selected parameters

### Comprehensive empirical model of substitution – influence on hydrogen bonding in aromatic Schiff bases

Katarzyna M. Krupka<sup>1</sup>, Michał Pocheć<sup>1</sup>, Jarosław J. Panek<sup>1</sup> and Aneta Jezierska<sup>1\*</sup>

<sup>1</sup>Faculty of Chemistry, University of Wrocław, ul. F. Joliot-Curie 14, 50-383 Wrocław, Poland

Correspondence should be addressed to: aneta.jezierska@chem.uni.wroc.pl.

**Table SB1.** Statistical description of activation energies for ortho group – proximal effect in the gas phase.

| Sub.               | Mean activation energy [kcal/mol] | Standard deviation | Min. Value | Max. Value |
|--------------------|-----------------------------------|--------------------|------------|------------|
| None               | 7.228                             | 0.987              | 5.910      | 9.250      |
| NO <sub>2</sub> ,4 | 7.114                             | 0.820              | 5.977      | 8.645      |
| NO <sub>2</sub> ,3 | 7.385                             | 0.949              | 5.998      | 9.303      |
| NO <sub>2</sub> ,2 | 7.425                             | 0.968              | 5.894      | 9.238      |
| NO <sub>2</sub> ,1 | 7.797                             | 0.928              | 6.429      | 9.688      |
| NH <sub>2</sub> ,4 | 7.225                             | 0.981              | 5.788      | 9.100      |
| NH <sub>2</sub> ,3 | 7.107                             | 0.923              | 5.650      | 9.069      |
| NH <sub>2</sub> ,2 | 7.428                             | 0.949              | 5.975      | 9.274      |
| NH <sub>2</sub> ,1 | 7.242                             | 0.869              | 5.856      | 9.057      |
| Br,4               | 7.221                             | 0.823              | 5.979      | 8.762      |
| Br,3               | 7.451                             | 0.901              | 6.162      | 9.240      |
| Br,2               | 7.374                             | 0.928              | 5.929      | 9.272      |
| Br,1               | 7.457                             | 0.942              | 5.981      | 9.411      |

**Table SB2.** Statistical description of activation energies for ortho group – distal effect in the gas phase.

| Sub.  | Mean activation energy<br>[kcal/mol] | Standard deviation | Min. Value | Max. Value |
|-------|--------------------------------------|--------------------|------------|------------|
| Br,1  | 6.449                                | 0.167              | 6.204      | 6.684      |
| Br,2  | 8.105                                | 0.259              | 7.785      | 8.619      |
| Br,3  | 7.700                                | 0.284              | 7.347      | 8.200      |
| Br,4  | 6.858                                | 0.254              | 6.625      | 7.635      |
| NH2,1 | 7.410                                | 0.246              | 6.934      | 7.675      |
| NH2,2 | 9.178                                | 0.266              | 8.645      | 9.688      |
| NH2,3 | 7.229                                | 0.302              | 6.838      | 7.823      |
| NH2,4 | 7.359                                | 0.201              | 6.981      | 7.793      |
| NO2,1 | 6.140                                | 0.159              | 5.856      | 6.429      |
| NO2,2 | 6.852                                | 0.214              | 6.573      | 7.272      |
| NO2,3 | 7.946                                | 0.253              | 7.524      | 8.500      |
| NO2,4 | 5.992                                | 0.252              | 5.650      | 6.702      |
| None  | 8.219                                | 0.264              | 7.795      | 8.525      |

**Table SB3.** Statistical description of activation energies for meta group – proximal effect in the gas phase.

| Sub.  | Mean activation energy<br>[kcal/mol] | Standard deviation | Min. Value | Max. Value |
|-------|--------------------------------------|--------------------|------------|------------|
| None  | 7.359                                | 0.890              | 5.938      | 9.119      |
| NO2,4 | 7.683                                | 0.877              | 6.216      | 9.361      |
| NO2,3 | 7.620                                | 0.876              | 6.199      | 9.303      |
| NO2,2 | 7.575                                | 0.879              | 6.150      | 9.274      |
| NO2,1 | 7.474                                | 0.885              | 6.045      | 9.191      |
| NH2,4 | 7.314                                | 0.892              | 5.900      | 9.066      |
| NH2,3 | 7.181                                | 0.894              | 5.779      | 8.959      |
| NH2,2 | 7.312                                | 0.890              | 5.904      | 9.053      |
| NH2,1 | 7.316                                | 0.905              | 5.882      | 9.093      |
| Br,4  | 7.501                                | 0.885              | 6.058      | 9.215      |
| Br,3  | 7.447                                | 0.885              | 6.018      | 9.169      |
| Br,2  | 7.452                                | 0.885              | 6.029      | 9.182      |
| Br,1  | 7.417                                | 0.890              | 5.981      | 9.155      |

**Table SB4.** Statistical description of activation energies for meta group – distal effect in the gas phase.

| Sub.  | Mean activation energy<br>[kcal/mol] | Standard deviation | Min. Value | Max. Value |
|-------|--------------------------------------|--------------------|------------|------------|
| Br,1  | 6.534                                | 0.140              | 6.290      | 6.766      |
| Br,2  | 8.175                                | 0.145              | 7.917      | 8.417      |
| Br,3  | 7.746                                | 0.143              | 7.478      | 7.986      |
| Br,4  | 7.273                                | 0.150              | 7.015      | 7.534      |
| NH2,1 | 7.311                                | 0.159              | 7.039      | 7.627      |
| NH2,2 | 9.165                                | 0.110              | 8.959      | 9.361      |
| NH2,3 | 7.276                                | 0.113              | 7.060      | 7.480      |
| NH2,4 | 7.408                                | 0.144              | 7.159      | 7.646      |
| NO2,1 | 6.007                                | 0.129              | 5.779      | 6.216      |
| NO2,2 | 6.868                                | 0.174              | 6.544      | 7.155      |
| NO2,3 | 8.108                                | 0.149              | 7.837      | 8.371      |
| NO2,4 | 6.364                                | 0.161              | 6.106      | 6.672      |
| None  | 8.414                                | 0.134              | 8.171      | 8.653      |

**Table SB5.** Statistical description of activation energies for para group – proximal effect in the gas phase.

| Sub.  | Mean activation energy<br>[kcal/mol] | Standard deviation | Min. Value | Max. Value |
|-------|--------------------------------------|--------------------|------------|------------|
| None  | 7.181                                | 0.903              | 5.688      | 8.946      |
| NO2,4 | 7.441                                | 0.899              | 5.915      | 9.155      |
| NO2,3 | 7.592                                | 0.798              | 6.379      | 9.174      |
| NO2,2 | 7.495                                | 0.891              | 5.957      | 9.190      |
| NO2,1 | 7.372                                | 0.902              | 5.973      | 9.143      |
| NH2,4 | 7.154                                | 0.904              | 5.666      | 8.924      |
| NH2,3 | 7.010                                | 0.907              | 5.522      | 8.800      |
| NH2,2 | 7.125                                | 0.904              | 5.639      | 8.892      |
| NH2,1 | 7.128                                | 0.899              | 5.621      | 8.871      |
| Br,4  | 7.291                                | 0.900              | 5.775      | 9.019      |
| Br,3  | 7.286                                | 0.896              | 5.783      | 9.011      |
| Br,2  | 7.311                                | 0.900              | 5.802      | 9.056      |
| Br,1  | 7.264                                | 0.903              | 5.766      | 9.018      |

**Table SB6.** Statistical description of activation energies for para group – distal effect in the gas phase.

| Sub.  | Mean activation energy [kcal/mol] | Standard deviation | Min. Value | Max. Value |
|-------|-----------------------------------|--------------------|------------|------------|
| Br,1  | 6.397                             | 0.144              | 6.148      | 6.608      |
| Br,2  | 8.008                             | 0.151              | 7.737      | 8.233      |
| Br,3  | 7.583                             | 0.151              | 7.329      | 7.809      |
| Br,4  | 7.106                             | 0.159              | 6.827      | 7.335      |
| NH2,1 | 7.226                             | 0.185              | 6.924      | 7.480      |
| NH2,2 | 9.015                             | 0.125              | 8.800      | 9.190      |
| NH2,3 | 7.140                             | 0.122              | 6.916      | 7.311      |
| NH2,4 | 7.285                             | 0.153              | 7.016      | 7.509      |
| NO2,1 | 5.759                             | 0.140              | 5.522      | 5.973      |
| NO2,2 | 6.678                             | 0.184              | 6.354      | 6.950      |
| NO2,3 | 7.917                             | 0.157              | 7.641      | 8.147      |
| NO2,4 | 6.180                             | 0.159              | 5.912      | 6.437      |
| None  | 8.257                             | 0.146              | 8.002      | 8.473      |

**Table SB7.** Statistical description of activation energies for ortho group – proximal effect in PCM.

| Sub.  | Mean activation energy [kcal/mol] | Standard deviation | Min. value | Max. Value |
|-------|-----------------------------------|--------------------|------------|------------|
| None  | 7.228                             | 0.987              | 5.910      | 9.250      |
| NO2,4 | 7.147                             | 0.794              | 5.977      | 8.645      |
| NO2,3 | 7.385                             | 0.949              | 5.998      | 9.303      |
| NO2,2 | 7.425                             | 0.968              | 5.894      | 9.238      |
| NO2,1 | 7.797                             | 0.928              | 6.429      | 9.688      |
| NH2,4 | 7.228                             | 0.939              | 5.788      | 9.100      |
| NH2,3 | 7.107                             | 0.923              | 5.650      | 9.069      |
| NH2,2 | 7.428                             | 0.949              | 5.975      | 9.274      |
| NH2,1 | 7.242                             | 0.869              | 5.856      | 9.057      |
| Br,4  | 7.221                             | 0.823              | 5.979      | 8.762      |
| Br,3  | 7.318                             | 0.912              | 5.850      | 9.240      |
| Br,2  | 7.374                             | 0.928              | 5.929      | 9.272      |
| Br,1  | 7.457                             | 0.942              | 5.981      | 9.411      |

**Table SB8.** Statistical description of activation energies for ortho group – distal effect in PCM.

| Sub.  | Mean activation energy<br>[kcal/mol] | Standard deviation | Min. value | Max. Value |
|-------|--------------------------------------|--------------------|------------|------------|
| Br,1  | 6.449                                | 0.167              | 6.204      | 6.684      |
| Br,2  | 8.105                                | 0.259              | 7.785      | 8.619      |
| Br,3  | 7.663                                | 0.278              | 7.268      | 8.200      |
| Br,4  | 6.858                                | 0.254              | 6.625      | 7.635      |
| NH2,1 | 7.410                                | 0.246              | 6.934      | 7.675      |
| NH2,2 | 9.178                                | 0.266              | 8.645      | 9.688      |
| NH2,3 | 7.229                                | 0.302              | 6.838      | 7.823      |
| NH2,4 | 7.329                                | 0.219              | 6.976      | 7.793      |
| NO2,1 | 6.140                                | 0.159              | 5.856      | 6.429      |
| NO2,2 | 6.852                                | 0.214              | 6.573      | 7.272      |
| NO2,3 | 7.946                                | 0.253              | 7.524      | 8.500      |
| NO2,4 | 5.981                                | 0.245              | 5.650      | 6.702      |
| None  | 8.219                                | 0.264              | 7.795      | 8.525      |

**Table SB9.** Statistical description of activation energies for meta group – proximal effect in PCM.

| Sub.  | Mean activation energy<br>[kcal/mol] | Standard deviation | Min. value | Max. Value |
|-------|--------------------------------------|--------------------|------------|------------|
| None  | 7.161                                | 0.869              | 5.848      | 8.871      |
| NO2,4 | 7.455                                | 0.855              | 6.102      | 9.071      |
| NO2,3 | 7.404                                | 0.858              | 6.092      | 9.037      |
| NO2,2 | 7.367                                | 0.859              | 6.055      | 9.008      |
| NO2,1 | 7.279                                | 0.864              | 5.963      | 8.951      |
| NH2,4 | 7.124                                | 0.866              | 5.815      | 8.825      |
| NH2,3 | 6.995                                | 0.864              | 5.694      | 8.705      |
| NH2,2 | 7.118                                | 0.870              | 5.816      | 8.811      |
| NH2,1 | 7.120                                | 0.883              | 5.788      | 8.848      |
| Br,4  | 7.292                                | 0.864              | 5.963      | 8.955      |
| Br,3  | 7.243                                | 0.863              | 5.921      | 8.905      |
| Br,2  | 7.248                                | 0.866              | 5.939      | 8.930      |
| Br,1  | 7.222                                | 0.869              | 5.896      | 8.901      |

**Table SB10.** Statistical description of activation energies for meta group – distal effect in the gas phase.

| Sub.  | Mean activation energy<br>[kcal/mol] | Standard deviation | Min. value | Max. Value |
|-------|--------------------------------------|--------------------|------------|------------|
| Br,1  | 6.393                                | 0.129              | 6.174      | 6.595      |
| Br,2  | 7.969                                | 0.135              | 7.727      | 8.186      |
| Br,3  | 7.541                                | 0.134              | 7.284      | 7.763      |
| Br,4  | 7.052                                | 0.143              | 6.797      | 7.281      |
| NH2,1 | 7.098                                | 0.155              | 6.839      | 7.401      |
| NH2,2 | 8.909                                | 0.100              | 8.705      | 9.071      |
| NH2,3 | 7.057                                | 0.107              | 6.844      | 7.236      |
| NH2,4 | 7.205                                | 0.123              | 6.984      | 7.413      |
| NO2,1 | 5.915                                | 0.123              | 5.694      | 6.102      |
| NO2,2 | 6.664                                | 0.157              | 6.385      | 6.920      |
| NO2,3 | 7.910                                | 0.142              | 7.640      | 8.149      |
| NO2,4 | 6.105                                | 0.137              | 5.888      | 6.377      |
| None  | 8.209                                | 0.128              | 7.967      | 8.426      |

**Table SB11.** Statistical description of activation energies for para group – proximal effect in PCM.

| Sub.  | Mean activation energy<br>[kcal/mol] | Standard deviation | Min. value | Max. Value |
|-------|--------------------------------------|--------------------|------------|------------|
| None  | 7.012                                | 0.880              | 5.633      | 8.728      |
| NO2,4 | 7.254                                | 0.877              | 5.851      | 8.913      |
| NO2,3 | 7.280                                | 0.869              | 5.893      | 8.925      |
| NO2,2 | 7.298                                | 0.867              | 5.897      | 8.948      |
| NO2,1 | 7.226                                | 0.870              | 5.837      | 8.896      |
| NH2,4 | 6.990                                | 0.879              | 5.612      | 8.708      |
| NH2,3 | 6.852                                | 0.884              | 5.484      | 8.609      |
| NH2,2 | 6.964                                | 0.883              | 5.584      | 8.683      |
| NH2,1 | 6.968                                | 0.882              | 5.559      | 8.685      |
| Br,4  | 7.120                                | 0.873              | 5.726      | 8.797      |
| Br,3  | 7.111                                | 0.874              | 5.719      | 8.787      |
| Br,2  | 7.134                                | 0.876              | 5.740      | 8.822      |
| Br,1  | 7.092                                | 0.879              | 5.704      | 8.798      |

**Table SB12.** Statistical description of activation energies for para group – distal effect in PCM.

| Sub.  | Mean activation energy<br>[kcal/mol] | Standard deviation | Min. value | Max. Value |
|-------|--------------------------------------|--------------------|------------|------------|
| Br,1  | 6.277                                | 0.134              | 6.044      | 6.471      |
| Br,2  | 7.828                                | 0.140              | 7.574      | 8.027      |
| Br,3  | 7.402                                | 0.138              | 7.159      | 7.597      |
| Br,4  | 6.903                                | 0.151              | 6.630      | 7.121      |
| NH2,1 | 7.034                                | 0.175              | 6.739      | 7.274      |
| NH2,2 | 8.792                                | 0.106              | 8.609      | 8.948      |
| NH2,3 | 6.943                                | 0.109              | 6.733      | 7.084      |
| NH2,4 | 7.109                                | 0.135              | 6.870      | 7.302      |
| NO2,1 | 5.711                                | 0.133              | 5.484      | 5.897      |
| NO2,2 | 6.509                                | 0.165              | 6.215      | 6.755      |
| NO2,3 | 7.757                                | 0.147              | 7.479      | 7.950      |
| NO2,4 | 5.956                                | 0.139              | 5.707      | 6.170      |
| None  | 8.080                                | 0.137              | 7.835      | 8.275      |

**Figure SB1.** Differences of charge distribution from the non-substituted compound for the ortho group in the gas phase – Br substitution on proximal ring.

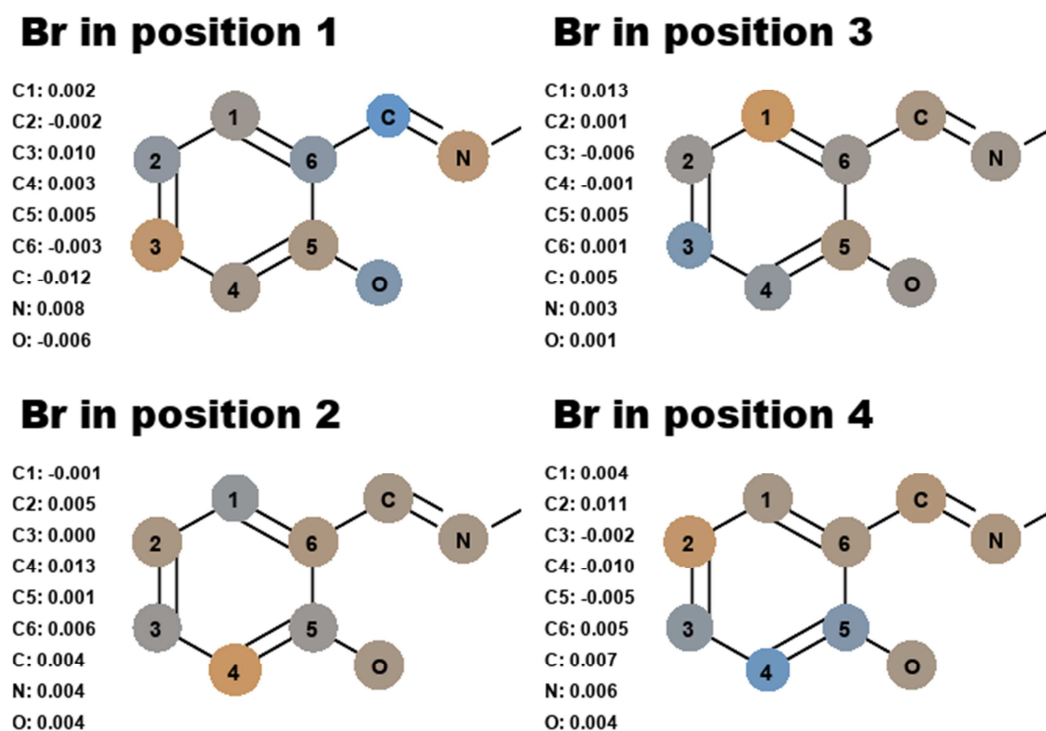

**Figure SB2.** Differences of charge distribution from the non-substituted compound for the ortho group in the gas phase – NO<sub>2</sub> substitution on proximal ring.

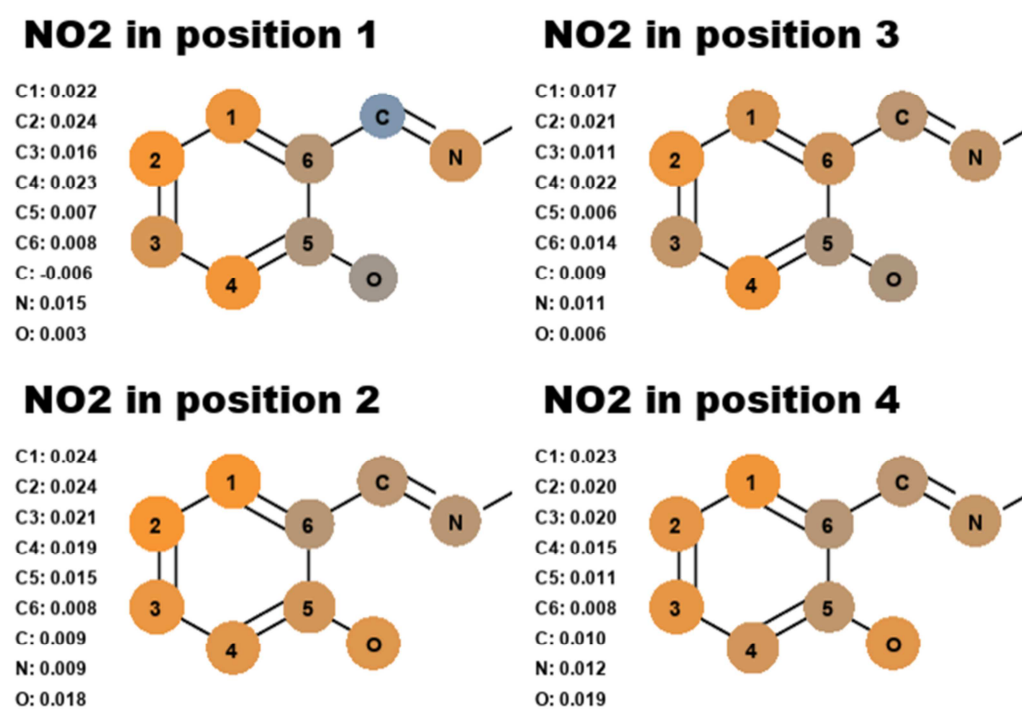



**Figure SB3.** Differences of charge distribution from the non-substituted compound for the ortho group in the gas phase – NH<sub>2</sub> substitution on proximal ring.

### NH<sub>2</sub> in position 1

C1: 0.044  
C2: -0.032  
C3: 0.001  
C4: -0.025  
C5: 0.002  
C6: -0.018  
C: -0.009  
N: -0.002  
O: -0.008

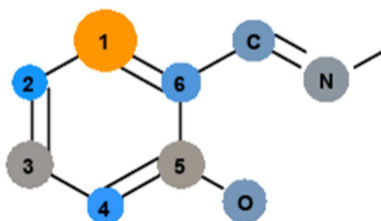

### NH<sub>2</sub> in position 3

C1: 0.005  
C2: -0.027  
C3: 0.037  
C4: -0.037  
C5: 0.002  
C6: -0.016  
C: -0.004  
N: -0.010  
O: -0.007

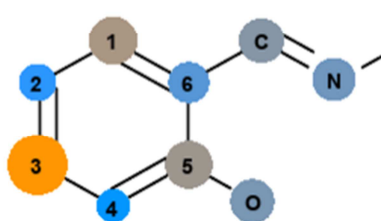

### NH<sub>2</sub> in position 2

C1: -0.031  
C2: 0.047  
C3: -0.023  
C4: 0.004  
C5: -0.015  
C6: 0.002  
C: -0.002  
N: -0.001  
O: -0.009

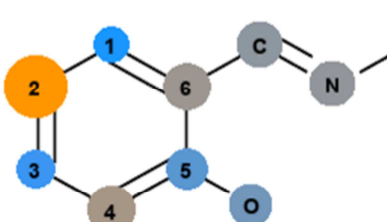

### NH<sub>2</sub> in position 4

C1: -0.028  
C2: 0.001  
C3: -0.035  
C4: 0.036  
C5: -0.020  
C6: -0.001  
C: 0.003  
N: -0.000  
O: 0.000

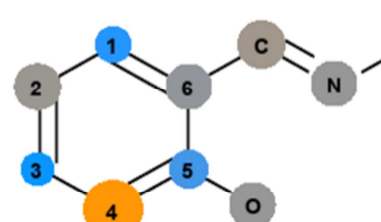

**Figure SB4.** Differences of charge distribution from the non-substituted compound for the meta group in the gas phase – Br substitution on proximal ring.

### Br in position 1

C1: 0.000  
C2: -0.002  
C3: 0.010  
C4: 0.004  
C5: 0.005  
C6: -0.004  
C: -0.016  
N: 0.009  
O: -0.000

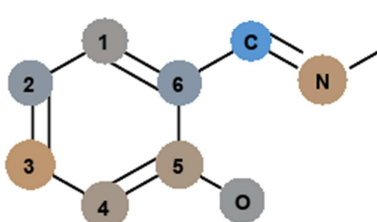

### Br in position 3

C1: 0.012  
C2: 0.000  
C3: -0.007  
C4: -0.001  
C5: 0.005  
C6: 0.001  
C: 0.002  
N: 0.002  
O: 0.007

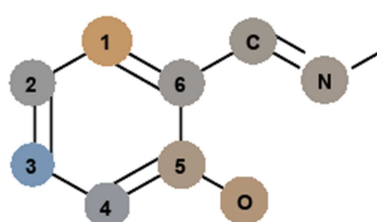

### Br in position 2

C1: -0.001  
C2: 0.004  
C3: 0.000  
C4: 0.013  
C5: 0.001  
C6: 0.006  
C: 0.004  
N: 0.004  
O: 0.005

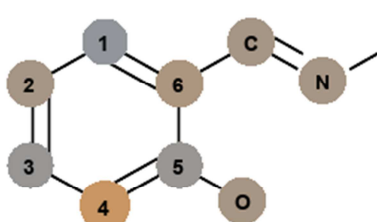

### Br in position 4

C1: 0.003  
C2: 0.011  
C3: -0.003  
C4: -0.010  
C5: -0.006  
C6: 0.004  
C: 0.003  
N: 0.005  
O: 0.010

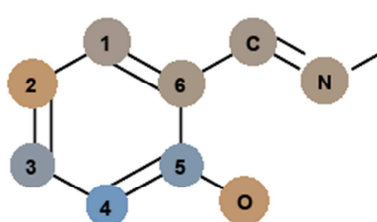

**Figure SB5.** Differences of charge distribution from the non-substituted compound for the meta group in the gas phase – NO<sub>2</sub> substitution on proximal ring.

### NO<sub>2</sub> in position 1

C1: 0.020  
C2: 0.024  
C3: 0.016  
C4: 0.024  
C5: 0.006  
C6: 0.009  
C: -0.006  
N: 0.015  
O: 0.003

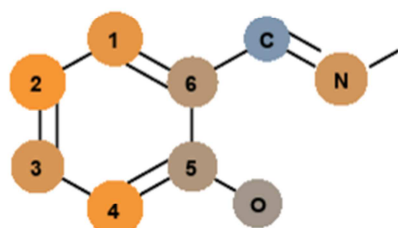

### NO<sub>2</sub> in position 3

C1: 0.016  
C2: 0.021  
C3: 0.010  
C4: 0.023  
C5: 0.006  
C6: 0.013  
C: 0.006  
N: 0.011  
O: 0.012

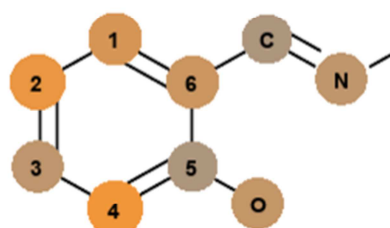

### NO<sub>2</sub> in position 2

C1: 0.024  
C2: 0.024  
C3: 0.021  
C4: 0.019  
C5: 0.015  
C6: 0.008  
C: 0.009  
N: 0.009  
O: 0.018

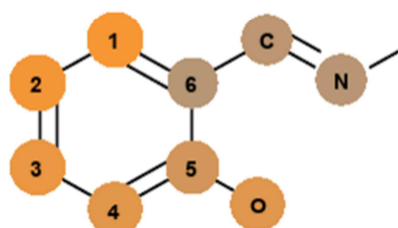

### NO<sub>2</sub> in position 4

C1: 0.022  
C2: 0.019  
C3: 0.020  
C4: 0.016  
C5: 0.010  
C6: 0.007  
C: 0.006  
N: 0.011  
O: 0.025

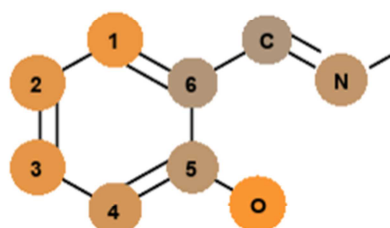

**Figure SB6.** Differences of charge distribution from the non-substituted compound for the meta group in the gas phase – NH<sub>2</sub> substitution on proximal ring.

### NH<sub>2</sub> in position 1

C1: 0.043  
C2: -0.033  
C3: 0.000  
C4: -0.025  
C5: 0.001  
C6: -0.019  
C: -0.011  
N: -0.002  
O: -0.004

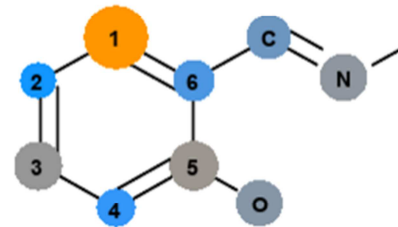

### NH<sub>2</sub> in position 3

C1: 0.003  
C2: -0.028  
C3: 0.036  
C4: -0.037  
C5: 0.001  
C6: -0.017  
C: -0.008  
N: -0.011  
O: -0.002

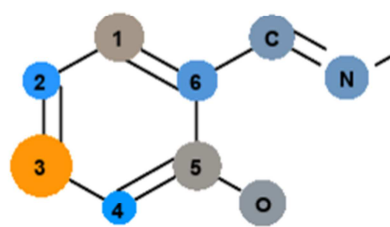

### NH<sub>2</sub> in position 2

C1: -0.031  
C2: 0.046  
C3: -0.023  
C4: 0.004  
C5: -0.015  
C6: 0.002  
C: -0.002  
N: -0.001  
O: -0.009

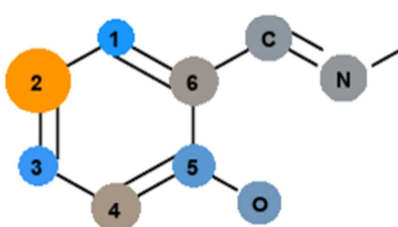

### NH<sub>2</sub> in position 4

C1: -0.028  
C2: 0.001  
C3: -0.035  
C4: 0.037  
C5: -0.021  
C6: -0.001  
C: 0.002  
N: -0.000  
O: 0.000

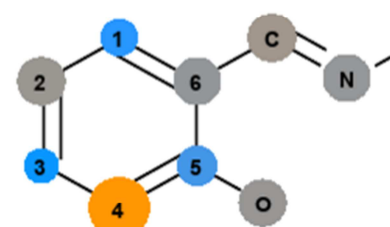

**Figure SB7.** Differences of charge distribution from the non-substituted compound for the para group in the gas phase – Br substitution.

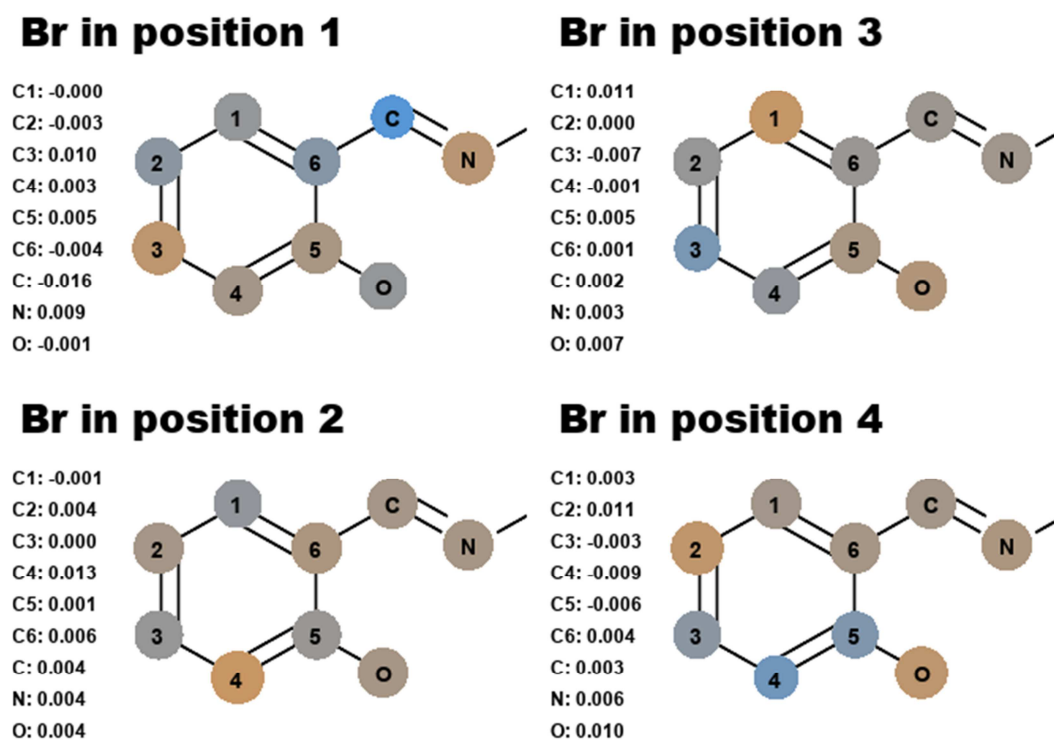

**Figure SB8.** Differences of charge distribution from the non-substituted compound for the para group in the gas phase – NO<sub>2</sub> substitution.

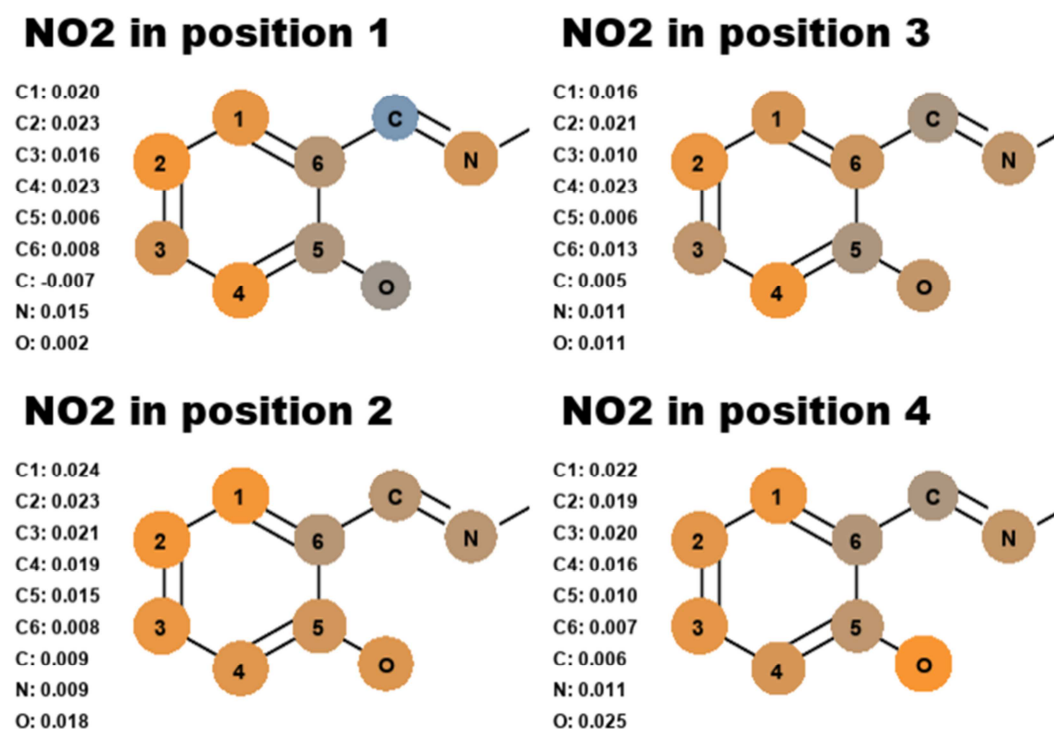

**Figure SB9.** Differences of charge distribution from the non-substituted compound for the para group in the gas phase – NH<sub>2</sub> substitution.

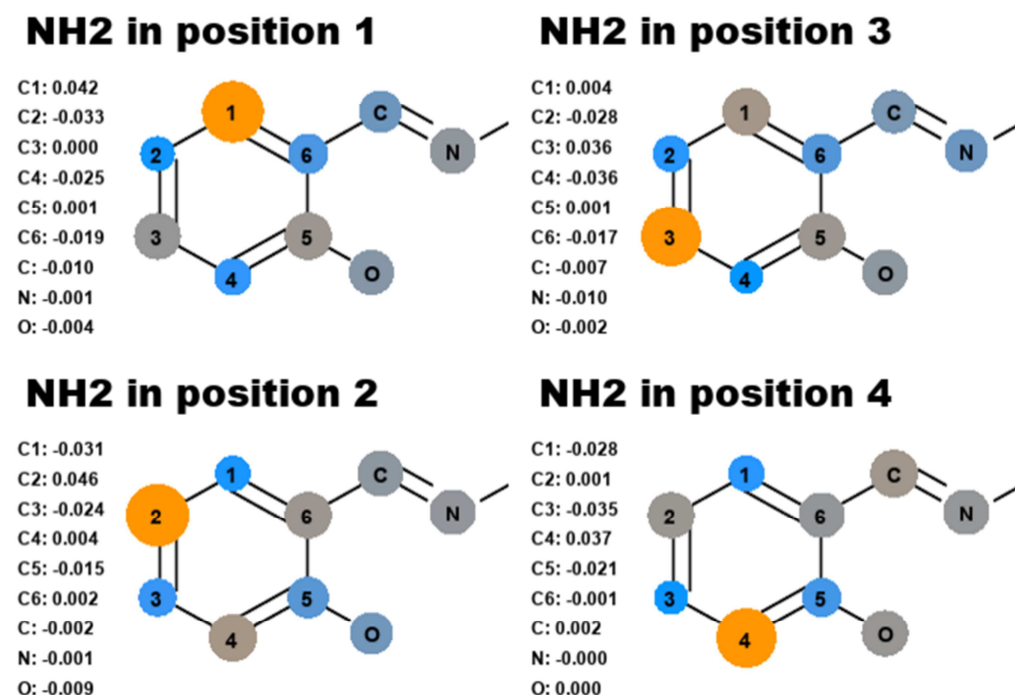

**Figure SB10.** Additional parameters distribution in different substitution patterns for ortho compounds group in the gas phase.

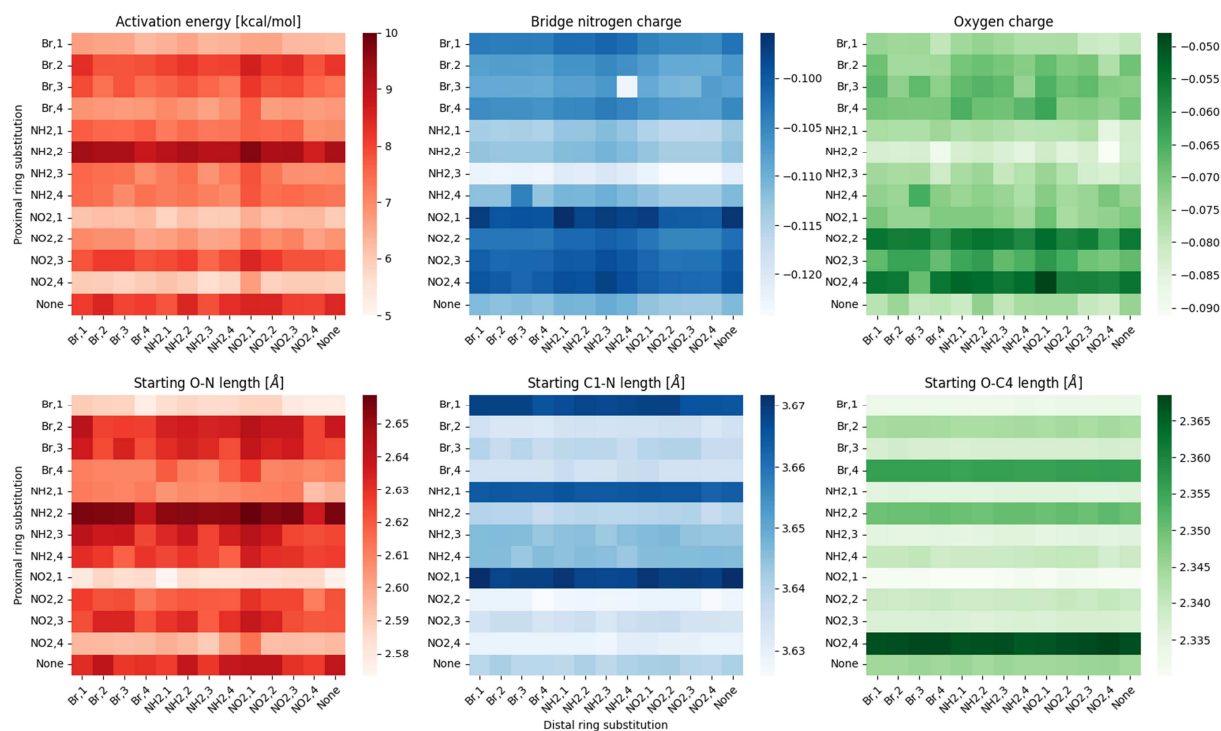

**Figure SB11.** Additional parameters distribution in different substitution patterns for meta compounds group in the gas phase.

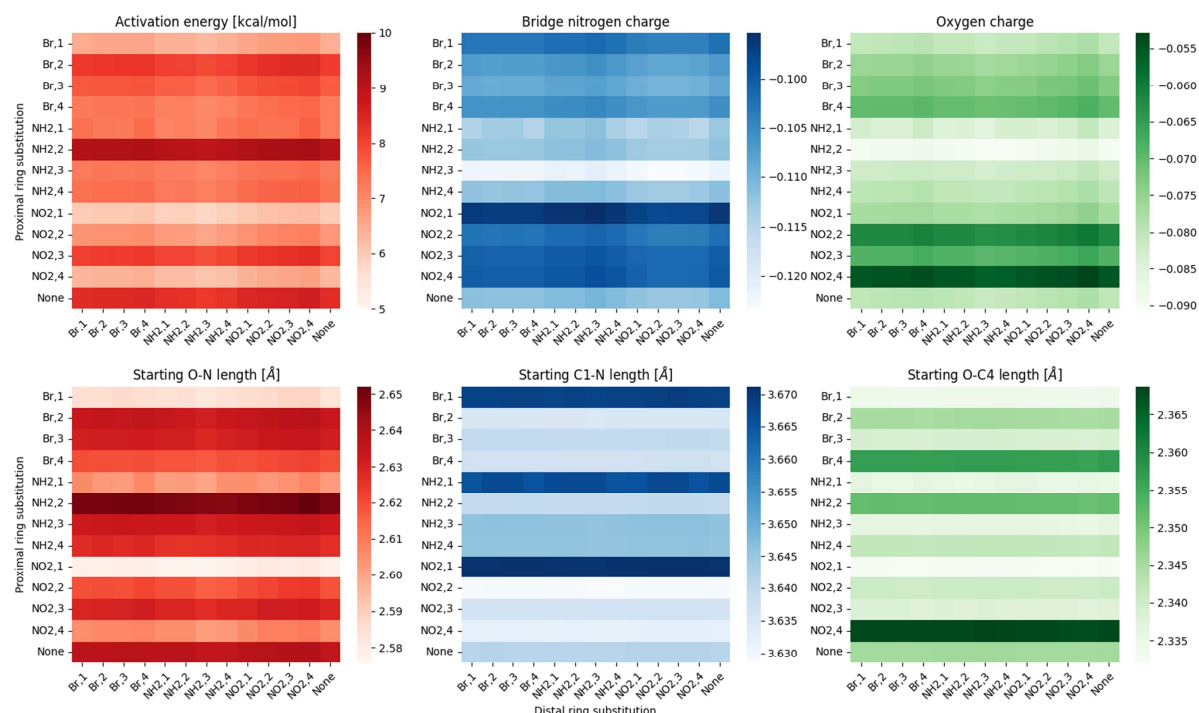

**Figure SB12.** Additional parameters distribution in different substitution patterns for para compounds group in the gas phase.

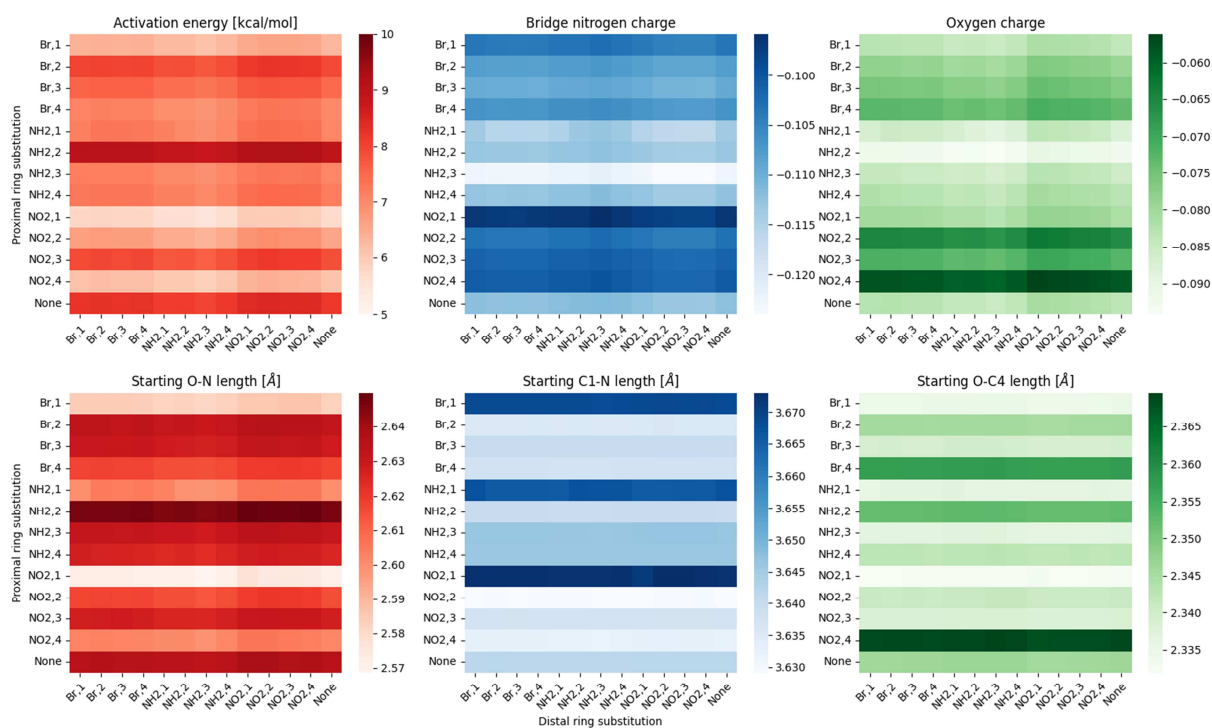

**Figure SB13.** Heatmaps of the activation energy (left), second minimum (middle) and the difference between them (right) in different substitution patterns for para compounds group in PCM.

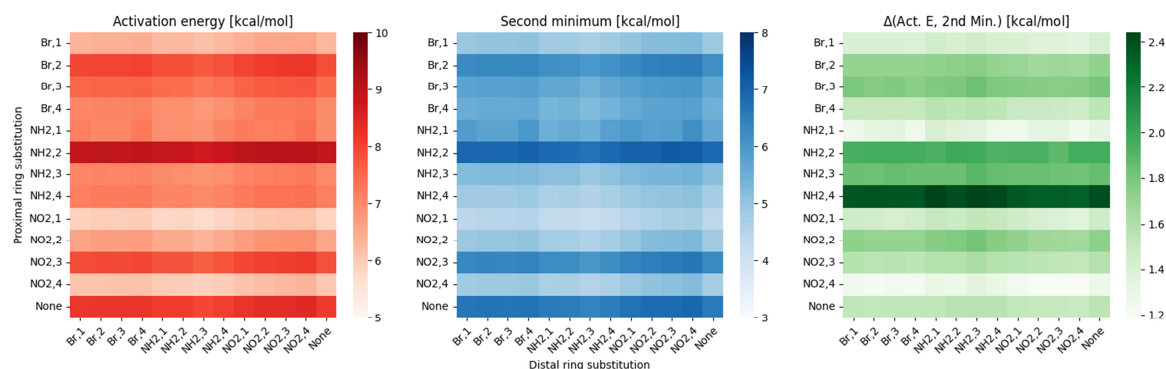

**Figure SB14.** Heatmaps of the activation energy (left), second minimum (middle) and the difference between them (right) in different substitution patterns for meta compounds group in PCM.

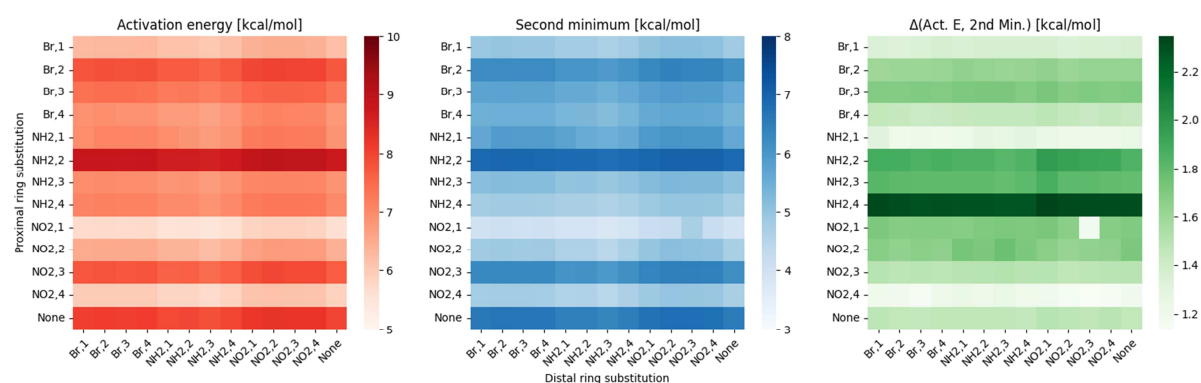

**Figure SB15.** Heatmaps of the activation energy (left), second minimum (middle) and the difference between them (right) in different substitution patterns for ortho compounds group in PCM.

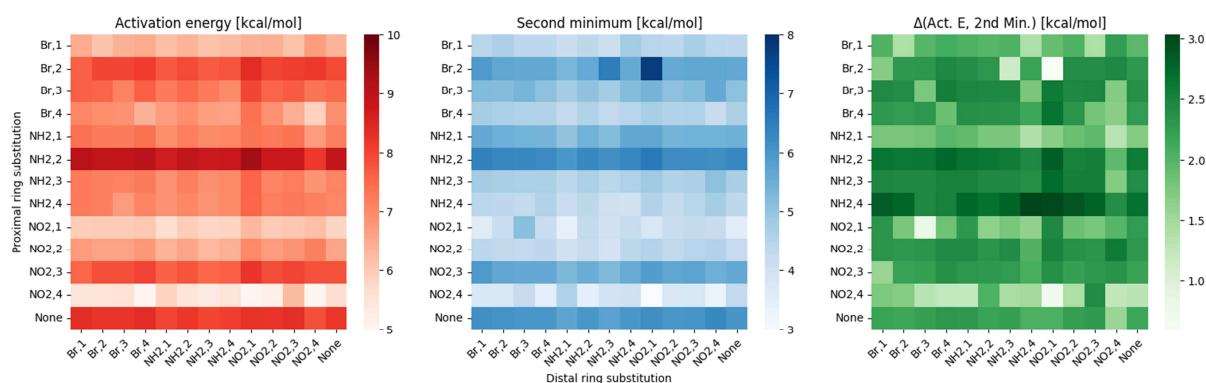



**Figure SB16.** Distribution of residuals for the model assessment – green for activation energy and yellow for the second minimum.

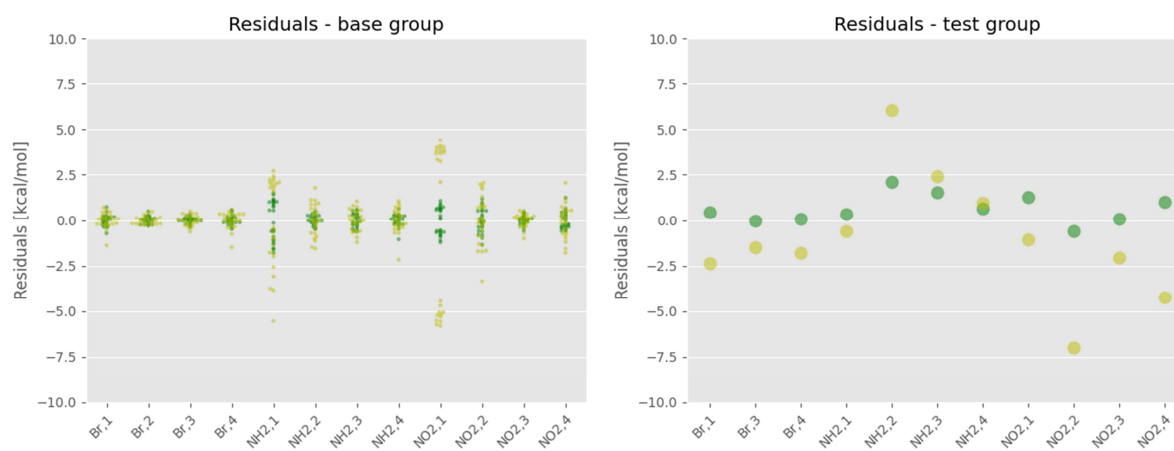

Supplement: s1 [file s1]
