# Supplementary material for: Comprehensive Empirical Model of Substitution—Influence on Hydrogen Bonding in Aromatic Schiff Bases
Source: MDPI journal article supplement (doi:10.3390/ijms232012439), 2022-10-18
Supplement: s1 [file s1]

## Supplement SA: Naming scheme

### Comprehensive empirical model of substitution – influence on hydrogen bonding in aromatic Schiff bases

Katarzyna M. Krupka<sup>1</sup>, Michał Pocheć<sup>1</sup>, Jarosław J. Panek<sup>1</sup> and Aneta Jezierska<sup>1\*</sup>

<sup>1</sup>Faculty of Chemistry, University of Wrocław, ul. F. Joliot-Curie 14, 50-383 Wrocław, Poland

Correspondence should be addressed to: aneta.jezierska@chem.uni.wroc.pl.

**Table SA1.** Ortho naming scheme:

| File Name  | Type  | Ring A sub. | Sub. in position | Ring B sub. | Sub. in position | A sub. ID | B sub. ID |
|------------|-------|-------------|------------------|-------------|------------------|-----------|-----------|
| ortobr11   | ortho | Br          | 1                | Br          | 1                | Br,1      | Br,1      |
| ortobr12   | ortho | Br          | 2                | Br          | 1                | Br,2      | Br,1      |
| ortobr13   | ortho | Br          | 3                | Br          | 1                | Br,3      | Br,1      |
| ortobr14   | ortho | Br          | 4                | Br          | 1                | Br,4      | Br,1      |
| ortobr1    | ortho | Br          | 1                | None        | None             | Br,1      | None,None |
| ortobr22   | ortho | Br          | 2                | Br          | 2                | Br,2      | Br,2      |
| ortobr23   | ortho | Br          | 3                | Br          | 2                | Br,3      | Br,2      |
| ortobr24   | ortho | Br          | 4                | Br          | 2                | Br,4      | Br,2      |
| ortobr2    | ortho | Br          | 2                | None        | None             | Br,2      | None,None |
| ortobr34   | ortho | Br          | 3                | Br          | 4                | Br,3      | Br,4      |
| ortobr3    | ortho | Br          | 3                | None        | None             | Br,3      | None,None |
| ortobr44   | ortho | Br          | 4                | Br          | 4                | Br,4      | Br,4      |
| ortobr4    | ortho | Br          | 4                | None        | None             | Br,4      | None,None |
| ortobrn11  | ortho | NH2         | 1                | Br          | 1                | NH2,1     | Br,1      |
| ortobrn12  | ortho | NH2         | 2                | Br          | 1                | NH2,2     | Br,1      |
| ortobrn13  | ortho | NH2         | 3                | Br          | 1                | NH2,3     | Br,1      |
| ortobrn14  | ortho | NH2         | 4                | Br          | 1                | NH2,4     | Br,1      |
| ortobrn22  | ortho | NH2         | 2                | Br          | 2                | NH2,2     | Br,2      |
| ortobrn23  | ortho | NH2         | 3                | Br          | 2                | NH2,3     | Br,2      |
| ortobrn24  | ortho | NH2         | 4                | Br          | 2                | NH2,4     | Br,2      |
| ortobrn33  | ortho | NH2         | 3                | Br          | 3                | NH2,3     | Br,3      |
| ortobrn44  | ortho | NH2         | 4                | Br          | 4                | NH2,4     | Br,4      |
| ortobrno11 | ortho | NO2         | 1                | Br          | 1                | NO2,1     | Br,1      |
| ortobrno12 | ortho | NO2         | 2                | Br          | 1                | NO2,2     | Br,1      |
| ortobrno13 | ortho | NO2         | 3                | Br          | 1                | NO2,3     | Br,1      |
| ortobrno14 | ortho | NO2         | 4                | Br          | 1                | NO2,4     | Br,1      |
| ortobrno22 | ortho | NO2         | 2                | Br          | 2                | NO2,2     | Br,2      |
| ortobrno23 | ortho | NO2         | 3                | Br          | 2                | NO2,3     | Br,2      |

|            |       |     |   |      |      |       |            |
|------------|-------|-----|---|------|------|-------|------------|
| ortobrn24  | ortho | NO2 | 4 | Br   | 2    | NO2,4 | Br,2       |
| ortobrn33  | ortho | NO2 | 3 | Br   | 3    | NO2,3 | Br,3       |
| ortobrn34  | ortho | NO2 | 3 | Br   | 4    | NO2,3 | Br,4       |
| ortobrn44  | ortho | NO2 | 4 | Br   | 4    | NO2,4 | Br,4       |
| ortonh11   | ortho | NH2 | 1 | NH2  | 1    | NH2,1 | NH2,1      |
| ortonh12   | ortho | NH2 | 2 | NH2  | 1    | NH2,2 | NH2,1      |
| ortonh13   | ortho | NH2 | 3 | NH2  | 1    | NH2,3 | NH2,1      |
| ortonh14   | ortho | NH2 | 4 | NH2  | 1    | NH2,4 | NH2,1      |
| ortonh1    | ortho | NH2 | 1 | None | None | NH2,1 | None, None |
| ortonh22   | ortho | NH2 | 2 | NH2  | 2    | NH2,2 | NH2,2      |
| ortonh23   | ortho | NH2 | 3 | NH2  | 2    | NH2,3 | NH2,2      |
| ortonh24   | ortho | NH2 | 4 | NH2  | 2    | NH2,4 | NH2,2      |
| ortonh2    | ortho | NH2 | 2 | None | None | NH2,2 | None, None |
| ortonh33   | ortho | NH2 | 3 | NH2  | 3    | NH2,3 | NH2,3      |
| ortonh34   | ortho | NH2 | 3 | NH2  | 4    | NH2,3 | NH2,4      |
| ortonh3    | ortho | NH2 | 3 | None | None | NH2,3 | None, None |
| ortonh44   | ortho | NH2 | 4 | NH2  | 4    | NH2,4 | NH2,4      |
| ortonh4    | ortho | NH2 | 4 | None | None | NH2,4 | None, None |
| ortonhbr12 | ortho | Br  | 2 | NH2  | 1    | Br,2  | NH2,1      |
| ortonhbr13 | ortho | Br  | 3 | NH2  | 1    | Br,3  | NH2,1      |
| ortonhbr14 | ortho | Br  | 4 | NH2  | 1    | Br,4  | NH2,1      |
| ortonhbr23 | ortho | Br  | 3 | NH2  | 2    | Br,3  | NH2,2      |
| ortonhbr24 | ortho | Br  | 4 | NH2  | 2    | Br,4  | NH2,2      |
| ortonhbr34 | ortho | Br  | 4 | NH2  | 3    | Br,4  | NH2,3      |
| ortonhno11 | ortho | NO2 | 1 | NH2  | 1    | NO2,1 | NH2,1      |
| ortonhno12 | ortho | NO2 | 2 | NH2  | 1    | NO2,2 | NH2,1      |
| ortonhno13 | ortho | NO2 | 3 | NH2  | 1    | NO2,3 | NH2,1      |
| ortonhno14 | ortho | NO2 | 4 | NH2  | 1    | NO2,4 | NH2,1      |
| ortonhno22 | ortho | NO2 | 2 | NH2  | 2    | NO2,2 | NH2,2      |
| ortonhno23 | ortho | NO2 | 3 | NH2  | 2    | NO2,3 | NH2,2      |
| ortonhno24 | ortho | NO2 | 4 | NH2  | 2    | NO2,4 | NH2,2      |
| ortonhno33 | ortho | NO2 | 3 | NH2  | 3    | NO2,3 | NH2,3      |
| ortonhno34 | ortho | NO2 | 3 | NH2  | 4    | NO2,3 | NH2,4      |
| ortonhno44 | ortho | NO2 | 4 | NH2  | 4    | NO2,4 | NH2,4      |
| ortono11   | ortho | NO2 | 1 | NO2  | 1    | NO2,1 | NO2,1      |
| ortono12   | ortho | NO2 | 2 | NO2  | 1    | NO2,2 | NO2,1      |
| ortono13   | ortho | NO2 | 3 | NO2  | 1    | NO2,3 | NO2,1      |
| ortono14   | ortho | NO2 | 4 | NO2  | 1    | NO2,4 | NO2,1      |
| ortono1    | ortho | NO2 | 1 | None | None | NO2,1 | None, None |
| ortono22   | ortho | NO2 | 2 | NO2  | 2    | NO2,2 | NO2,2      |
| ortono23   | ortho | NO2 | 3 | NO2  | 2    | NO2,3 | NO2,2      |
| ortono24   | ortho | NO2 | 4 | NO2  | 2    | NO2,4 | NO2,2      |
| ortono2    | ortho | NO2 | 2 | None | None | NO2,2 | None, None |
| ortono33   | ortho | NO2 | 3 | NO2  | 3    | NO2,3 | NO2,3      |
| ortono34   | ortho | NO2 | 3 | NO2  | 4    | NO2,3 | NO2,4      |
| ortono3    | ortho | NO2 | 3 | None | None | NO2,3 | None, None |

|            |       |      |      |      |      |            |            |
|------------|-------|------|------|------|------|------------|------------|
| ortono44   | ortho | NO2  | 4    | NO2  | 4    | NO2,4      | NO2,4      |
| ortono4    | ortho | NO2  | 4    | None | None | NO2,4      | None, None |
| ortonobr12 | ortho | Br   | 2    | NO2  | 1    | Br,2       | NO2,1      |
| ortonobr13 | ortho | Br   | 3    | NO2  | 1    | Br,3       | NO2,1      |
| ortonobr14 | ortho | Br   | 4    | NO2  | 1    | Br,4       | NO2,1      |
| ortonobr23 | ortho | Br   | 3    | NO2  | 2    | Br,3       | NO2,2      |
| ortonobr24 | ortho | Br   | 4    | NO2  | 2    | Br,4       | NO2,2      |
| ortonobr34 | ortho | Br   | 4    | NO2  | 3    | Br,4       | NO2,3      |
| ortononh12 | ortho | NH2  | 2    | NO2  | 1    | NH2,2      | NO2,1      |
| ortononh13 | ortho | NH2  | 3    | NO2  | 1    | NH2,3      | NO2,1      |
| ortononh14 | ortho | NH2  | 4    | NO2  | 1    | NH2,4      | NO2,1      |
| ortononh23 | ortho | NH2  | 3    | NO2  | 2    | NH2,3      | NO2,2      |
| ortononh24 | ortho | NH2  | 4    | NO2  | 2    | NH2,4      | NO2,2      |
| ortononh34 | ortho | NH2  | 3    | NO2  | 4    | NH2,3      | NO2,4      |
| orto       | ortho | None | None | None | None | None, None | None, None |

**Table SA2.** Meta naming scheme:

| File Name  | Type | Ring A sub. | Sub. in position | Ring B sub. | Sub. in position | A sub. ID  | B sub. ID  |
|------------|------|-------------|------------------|-------------|------------------|------------|------------|
| metaBr12   | meta | None        | None             | Br          | 2                | None, None | Br,2       |
| metaBr13   | meta | None        | None             | Br          | 3                | None, None | Br,3       |
| metaBr14   | meta | None        | None             | Br          | 4                | None, None | Br,4       |
| metaBr1    | meta | Br          | 1                | None        | None             | Br,1       | None, None |
| metaBr21   | meta | Br          | 4                | Br          | 1                | Br,4       | Br,1       |
| metaBr22   | meta | Br          | 1                | Br          | 1                | Br,1       | Br,1       |
| metaBr23   | meta | Br          | 2                | Br          | 3                | Br,2       | Br,3       |
| metaBr24   | meta | Br          | 4                | Br          | 4                | Br,4       | Br,4       |
| metaBr25   | meta | Br          | 3                | Br          | 3                | Br,3       | Br,3       |
| metaBr26   | meta | Br          | 2                | Br          | 2                | Br,2       | Br,2       |
| metabr27   | meta | Br          | 1                | Br          | 2                | Br,1       | Br,2       |
| metabr28   | meta | Br          | 1                | Br          | 3                | Br,1       | Br,3       |
| metabr29   | meta | Br          | 4                | Br          | 2                | Br,4       | Br,2       |
| metabr30   | meta | Br          | 4                | Br          | 3                | Br,4       | Br,3       |
| metabrnh21 | meta | Br          | 4                | NH2         | 1                | Br,4       | NH2,1      |
| metabrnh22 | meta | Br          | 1                | NH2         | 1                | Br,1       | NH2,1      |
| metabrnh23 | meta | Br          | 2                | NH2         | 3                | Br,2       | NH2,3      |
| metabrnh24 | meta | Br          | 4                | NH2         | 4                | Br,4       | NH2,4      |
| metabrnh25 | meta | Br          | 3                | NH2         | 3                | Br,3       | NH2,3      |
| metabrnh26 | meta | Br          | 2                | NH2         | 2                | Br,2       | NH2,2      |
| metabrnh27 | meta | Br          | 1                | NH2         | 2                | Br,1       | NH2,2      |
| metabrnh28 | meta | Br          | 1                | NH2         | 3                | Br,1       | NH2,3      |
| metabrnh29 | meta | Br          | 4                | NH2         | 2                | Br,4       | NH2,2      |
| metabrnh30 | meta | Br          | 4                | NH2         | 3                | Br,4       | NH2,3      |
| metabrno21 | meta | Br          | 4                | NO2         | 1                | Br,4       | NO2,1      |
| metabrno22 | meta | Br          | 1                | NO2         | 1                | Br,1       | NO2,1      |

|            |      |      |      |      |      |           |           |
|------------|------|------|------|------|------|-----------|-----------|
| metabrno23 | meta | Br   | 2    | NO2  | 3    | Br,2      | NO2,3     |
| metabrno24 | meta | Br   | 4    | NO2  | 4    | Br,4      | NO2,4     |
| metabrno25 | meta | Br   | 3    | NO2  | 3    | Br,3      | NO2,3     |
| metabrno26 | meta | Br   | 2    | NO2  | 2    | Br,2      | NO2,2     |
| metabrno27 | meta | Br   | 1    | NO2  | 2    | Br,1      | NO2,2     |
| metabrno28 | meta | Br   | 1    | NO2  | 3    | Br,1      | NO2,3     |
| metabrno29 | meta | Br   | 4    | NO2  | 2    | Br,4      | NO2,2     |
| metabrno30 | meta | Br   | 4    | NO2  | 3    | Br,4      | NO2,3     |
| metanh12   | meta | None | None | NH2  | 2    | None,None | NH2,2     |
| metanh13   | meta | None | None | NH2  | 3    | None,None | NH2,3     |
| metanh14   | meta | None | None | NH2  | 4    | None,None | NH2,4     |
| metanh1    | meta | NH2  | 1    | None | None | NH2,1     | None,None |
| metanh21   | meta | NH2  | 4    | NH2  | 1    | NH2,4     | NH2,1     |
| metanh22   | meta | NH2  | 1    | NH2  | 1    | NH2,1     | NH2,1     |
| metanh23   | meta | NH2  | 2    | NH2  | 3    | NH2,2     | NH2,3     |
| metanh24   | meta | NH2  | 4    | NH2  | 4    | NH2,4     | NH2,4     |
| metanh25   | meta | NH2  | 3    | NH2  | 3    | NH2,3     | NH2,3     |
| metanh26   | meta | NH2  | 2    | NH2  | 2    | NH2,2     | NH2,2     |
| metanh27   | meta | NH2  | 1    | NH2  | 2    | NH2,1     | NH2,2     |
| metanh28   | meta | NH2  | 1    | NH2  | 3    | NH2,1     | NH2,3     |
| metanh29   | meta | NH2  | 4    | NH2  | 2    | NH2,4     | NH2,2     |
| metanh30   | meta | NH2  | 4    | NH2  | 3    | NH2,4     | NH2,3     |
| metanhbr21 | meta | NH2  | 4    | Br   | 1    | NH2,4     | Br,1      |
| metanhbr23 | meta | NH2  | 2    | Br   | 3    | NH2,2     | Br,3      |
| metanhbr27 | meta | NH2  | 1    | Br   | 2    | NH2,1     | Br,2      |
| metanhbr28 | meta | NH2  | 1    | Br   | 3    | NH2,1     | Br,3      |
| metanhbr29 | meta | NH2  | 4    | Br   | 2    | NH2,4     | Br,2      |
| metanhbr30 | meta | NH2  | 4    | Br   | 3    | NH2,4     | Br,3      |
| metanhno21 | meta | NO2  | 4    | NH2  | 1    | NO2,4     | NH2,1     |
| metanhno22 | meta | NO2  | 1    | NH2  | 1    | NO2,1     | NH2,1     |
| metanhno23 | meta | NO2  | 2    | NH2  | 3    | NO2,2     | NH2,3     |
| metanhno24 | meta | NO2  | 4    | NH2  | 4    | NO2,4     | NH2,4     |
| metanhno25 | meta | NO2  | 3    | NH2  | 3    | NO2,3     | NH2,3     |
| metanhno26 | meta | NO2  | 2    | NH2  | 2    | NO2,2     | NH2,2     |
| metanhno27 | meta | NO2  | 1    | NH2  | 2    | NO2,1     | NH2,2     |
| metanhno28 | meta | NO2  | 1    | NH2  | 3    | NO2,1     | NH2,3     |
| metanhno29 | meta | NO2  | 4    | NH2  | 2    | NO2,4     | NH2,2     |
| metanhno30 | meta | NO2  | 4    | NH2  | 3    | NO2,4     | NH2,3     |
| metano12   | meta | None | None | NO2  | 2    | None,None | NO2,2     |
| metano13   | meta | None | None | NO2  | 3    | None,None | NO2,3     |
| metano14   | meta | None | None | NO2  | 4    | None,None | NO2,4     |
| metano1    | meta | NO2  | 1    | None | None | NO2,1     | None,None |
| metano21   | meta | NO2  | 4    | NO2  | 1    | NO2,4     | NO2,1     |
| metano22   | meta | NO2  | 1    | NO2  | 1    | NO2,1     | NO2,1     |
| metano23   | meta | NO2  | 2    | NO2  | 3    | NO2,2     | NO2,3     |
| metano24   | meta | NO2  | 4    | NO2  | 4    | NO2,4     | NO2,4     |

|            |      |      |      |      |      |            |            |
|------------|------|------|------|------|------|------------|------------|
| metano25   | meta | NO2  | 3    | NO2  | 3    | NO2,3      | NO2,3      |
| metano26   | meta | NO2  | 2    | NO2  | 2    | NO2,2      | NO2,2      |
| metano27   | meta | NO2  | 1    | NO2  | 2    | NO2,1      | NO2,2      |
| metano28   | meta | NO2  | 1    | NO2  | 3    | NO2,1      | NO2,3      |
| metano29   | meta | NO2  | 4    | NO2  | 2    | NO2,4      | NO2,2      |
| metano30   | meta | NO2  | 4    | NO2  | 3    | NO2,4      | NO2,3      |
| metanobr21 | meta | NO2  | 4    | Br   | 1    | NO2,4      | Br,1       |
| metanobr23 | meta | NO2  | 2    | Br   | 3    | NO2,2      | Br,3       |
| metanobr27 | meta | NO2  | 1    | Br   | 2    | NO2,1      | Br,2       |
| metanobr28 | meta | NO2  | 1    | Br   | 3    | NO2,1      | Br,3       |
| metanobr29 | meta | NO2  | 4    | Br   | 2    | NO2,4      | Br,2       |
| metanobr30 | meta | NO2  | 4    | Br   | 3    | NO2,4      | Br,3       |
| metanonh21 | meta | NH2  | 4    | NO2  | 1    | NH2,4      | NO2,1      |
| metanonh23 | meta | NH2  | 2    | NO2  | 3    | NH2,2      | NO2,3      |
| metanonh27 | meta | NH2  | 1    | NO2  | 2    | NH2,1      | NO2,2      |
| metanonh28 | meta | NH2  | 1    | NO2  | 3    | NH2,1      | NO2,3      |
| metanonh29 | meta | NH2  | 4    | NO2  | 2    | NH2,4      | NO2,2      |
| metanonh30 | meta | NH2  | 4    | NO2  | 3    | NH2,4      | NO2,3      |
| meta       | meta | None | None | None | None | None, None | None, None |

**Table SA3.** Para naming scheme:

| File Name | Type | Ring A sub. | Sub. in position | Ring B sub. | Sub. in position | A sub. ID  | B sub. ID |
|-----------|------|-------------|------------------|-------------|------------------|------------|-----------|
| parabr11  | para | Br          | 1                | Br          | 1                | Br,1       | Br,1      |
| parabr12  | para | Br          | 2                | Br          | 1                | Br,2       | Br,1      |
| parabr13  | para | Br          | 3                | Br          | 1                | Br,3       | Br,1      |
| parabr14  | para | Br          | 4                | Br          | 1                | Br,4       | Br,1      |
| parabr1   | para | None        | None             | Br          | 1                | None, None | Br,1      |
| parabr22  | para | Br          | 2                | Br          | 2                | Br,2       | Br,2      |
| parabr23  | para | Br          | 3                | Br          | 2                | Br,3       | Br,2      |
| parabr24  | para | Br          | 4                | Br          | 2                | Br,4       | Br,2      |
| parabr2   | para | None        | None             | Br          | 2                | None, None | Br,2      |
| parabr33  | para | Br          | 3                | Br          | 3                | Br,3       | Br,3      |
| parabr34  | para | Br          | 4                | Br          | 3                | Br,4       | Br,3      |
| parabr3   | para | None        | None             | Br          | 3                | None, None | Br,3      |
| parabr44  | para | Br          | 4                | Br          | 4                | Br,4       | Br,4      |
| parabr4   | para | None        | None             | Br          | 4                | None, None | Br,4      |
| parabrn11 | para | Br          | 1                | NH2         | 1                | Br,1       | NH2,1     |
| parabrn12 | para | Br          | 1                | NH2         | 2                | Br,1       | NH2,2     |
| parabrn13 | para | Br          | 1                | NH2         | 3                | Br,1       | NH2,3     |
| parabrn14 | para | Br          | 1                | NH2         | 4                | Br,1       | NH2,4     |
| parabrn22 | para | Br          | 2                | NH2         | 2                | Br,2       | NH2,2     |
| parabrn23 | para | Br          | 2                | NH2         | 3                | Br,2       | NH2,3     |
| parabrn24 | para | Br          | 2                | NH2         | 4                | Br,2       | NH2,4     |
| parabrn33 | para | Br          | 3                | NH2         | 3                | Br,3       | NH2,3     |

|            |      |      |      |     |   |            |       |
|------------|------|------|------|-----|---|------------|-------|
| parabrn34  | para | Br   | 3    | NH2 | 4 | Br,3       | NH2,4 |
| parabrn44  | para | Br   | 4    | NH2 | 4 | Br,4       | NH2,4 |
| parabrno11 | para | Br   | 1    | NO2 | 1 | Br,1       | NO2,1 |
| parabrno12 | para | Br   | 1    | NO2 | 2 | Br,1       | NO2,2 |
| parabrno13 | para | Br   | 1    | NO2 | 3 | Br,1       | NO2,3 |
| parabrno14 | para | Br   | 1    | NO2 | 4 | Br,1       | NO2,4 |
| parabrno22 | para | Br   | 2    | NO2 | 2 | Br,2       | NO2,2 |
| parabrno23 | para | Br   | 2    | NO2 | 3 | Br,2       | NO2,3 |
| parabrno24 | para | Br   | 2    | NO2 | 4 | Br,2       | NO2,4 |
| parabrno33 | para | Br   | 3    | NO2 | 3 | Br,3       | NO2,3 |
| parabrno34 | para | Br   | 3    | NO2 | 4 | Br,3       | NO2,4 |
| parabrno44 | para | Br   | 4    | NO2 | 4 | Br,4       | NO2,4 |
| paranh11   | para | NH2  | 1    | NH2 | 1 | NH2,1      | NH2,1 |
| paranh12   | para | NH2  | 2    | NH2 | 1 | NH2,2      | NH2,1 |
| paranh13   | para | NH2  | 3    | NH2 | 1 | NH2,3      | NH2,1 |
| paranh14   | para | NH2  | 4    | NH2 | 1 | NH2,4      | NH2,1 |
| paranh1    | para | None | None | NH2 | 1 | None, None | NH2,1 |
| paranh22   | para | NH2  | 2    | NH2 | 2 | NH2,2      | NH2,2 |
| paranh23   | para | NH2  | 3    | NH2 | 2 | NH2,3      | NH2,2 |
| paranh24   | para | NH2  | 4    | NH2 | 2 | NH2,4      | NH2,2 |
| paranh2    | para | None | None | NH2 | 2 | None, None | NH2,2 |
| paranh33   | para | NH2  | 3    | NH2 | 3 | NH2,3      | NH2,3 |
| paranh34   | para | NH2  | 4    | NH2 | 3 | NH2,4      | NH2,3 |
| paranh3    | para | None | None | NH2 | 3 | None, None | NH2,3 |
| paranh44   | para | NH2  | 4    | NH2 | 4 | NH2,4      | NH2,4 |
| paranh4    | para | None | None | NH2 | 4 | None, None | NH2,4 |
| paranhbr12 | para | NH2  | 1    | Br  | 2 | NH2,1      | Br,2  |
| paranhbr13 | para | NH2  | 1    | Br  | 3 | NH2,1      | Br,3  |
| paranhbr14 | para | NH2  | 1    | Br  | 4 | NH2,1      | Br,4  |
| paranhbr23 | para | NH2  | 2    | Br  | 3 | NH2,2      | Br,3  |
| paranhbr24 | para | NH2  | 2    | Br  | 4 | NH2,2      | Br,4  |
| paranhbr34 | para | NH2  | 3    | Br  | 4 | NH2,3      | Br,4  |
| paranhno11 | para | NH2  | 1    | NO2 | 1 | NH2,1      | NO2,1 |
| paranhno12 | para | NH2  | 1    | NO2 | 2 | NH2,1      | NO2,2 |
| paranhno13 | para | NH2  | 1    | NO2 | 3 | NH2,1      | NO2,3 |
| paranhno14 | para | NH2  | 1    | NO2 | 4 | NH2,1      | NO2,4 |
| paranhno22 | para | NH2  | 2    | NO2 | 2 | NH2,2      | NO2,2 |
| paranhno23 | para | NH2  | 2    | NO2 | 3 | NH2,2      | NO2,3 |
| paranhno24 | para | NH2  | 2    | NO2 | 4 | NH2,2      | NO2,4 |
| paranhno33 | para | NH2  | 3    | NO2 | 3 | NH2,3      | NO2,3 |
| paranhno34 | para | NH2  | 3    | NO2 | 4 | NH2,3      | NO2,4 |
| paranhno44 | para | NH2  | 4    | NO2 | 4 | NH2,4      | NO2,4 |
| parano11   | para | NO2  | 1    | NO2 | 1 | NO2,1      | NO2,1 |
| parano12   | para | NO2  | 2    | NO2 | 1 | NO2,2      | NO2,1 |
| parano14   | para | NO2  | 4    | NO2 | 1 | NO2,4      | NO2,1 |
| parano1    | para | None | None | NO2 | 1 | None, None | NO2,1 |

|            |      |      |      |      |      |            |            |
|------------|------|------|------|------|------|------------|------------|
| parano22   | para | NO2  | 2    | NO2  | 2    | NO2,2      | NO2,2      |
| parano23   | para | NO2  | 3    | NO2  | 2    | NO2,3      | NO2,2      |
| parano24   | para | NO2  | 4    | NO2  | 2    | NO2,4      | NO2,2      |
| parano2    | para | None | None | NO2  | 2    | None, None | NO2,2      |
| parano33   | para | NO2  | 3    | NO2  | 3    | NO2,3      | NO2,3      |
| parano34   | para | NO2  | 4    | NO2  | 3    | NO2,4      | NO2,3      |
| parano3    | para | None | None | NO2  | 3    | None, None | NO2,3      |
| parano44   | para | NO2  | 4    | NO2  | 4    | NO2,4      | NO2,4      |
| parano4    | para | None | None | NO2  | 4    | None, None | NO2,4      |
| paranobr12 | para | NO2  | 1    | Br   | 2    | NO2,1      | Br,2       |
| paranobr13 | para | NO2  | 1    | Br   | 3    | NO2,1      | Br,3       |
| paranobr14 | para | NO2  | 1    | Br   | 4    | NO2,1      | Br,4       |
| paranobr23 | para | NO2  | 2    | Br   | 3    | NO2,2      | Br,3       |
| paranobr24 | para | NO2  | 2    | Br   | 4    | NO2,2      | Br,4       |
| paranobr34 | para | NO2  | 3    | Br   | 4    | NO2,3      | Br,4       |
| paranonh12 | para | NO2  | 1    | NH2  | 2    | NO2,1      | NH2,2      |
| paranonh13 | para | NO2  | 1    | NH2  | 3    | NO2,1      | NH2,3      |
| paranonh14 | para | NO2  | 1    | NH2  | 4    | NO2,1      | NH2,4      |
| paranonh23 | para | NO2  | 2    | NH2  | 3    | NO2,2      | NH2,3      |
| paranonh24 | para | NO2  | 2    | NH2  | 4    | NO2,2      | NH2,4      |
| paranonh34 | para | NO2  | 3    | NH2  | 4    | NO2,3      | NH2,4      |
| para       | para | None | None | None | None | None, None | None, None |
